# Supplementary material for: Associations of dietary patterns with risk of gastrointestinal disorders: a prospective cohort study
Source: Royal Society of Chemistry journal article supplement (doi:10.1039/d4fo01668h), 2024-01-01
Supplement: d4fo01668h1.pdf [file d4fo01668h1.pdf]

## Supplementary materials

- 1
- 2
- 3 **Supplementary Methods 1.** Dietary assessment
- 4 **Supplementary Methods 2.** Outcome ascertainment
- 5 **Supplementary Methods 3.** Assessment of covariates
- 6 **Supplementary Methods 4.** Statistical analysis
- 7 **Supplementary Table 1.** Details of dietary patterns.
- 8 **Supplementary Table 2.** Associations between dietary patterns and gastrointestinal disorders risk
- 9 **Supplementary Table 3.** Associations between dietary patterns and gastrointestinal disorders in sensitivity
- 10 analyses
- 11 **Supplementary Table 4.** Baseline characteristics of participants excluded because of missing covariates data
- 12 and the population with complete 24-hour recall diet data and no certain disease or pregnant at baseline
- 13 **Supplementary Table 5.** Associations between dietary patterns and gastrointestinal disorders risk after
- 14 multiple imputation for missing values of covariates
- 15 **Supplementary Table 6.** Associations between food groups and gastrointestinal disorders
- 16 **Supplementary Figure 1.** Flowchart of participants included in the analyses
- 17 **Supplementary Figure 2.** Multivariable-adjusted cubic spline analysis of dietary pattern scores with the risk
- 18 of gastrointestinal disorders
- 19 **Supplementary Figure 3.** Multivariable-adjusted cubic spline analysis of dietary pattern scores with the risk
- 20 of inflammatory bowel disease
- 21 **Supplementary Figure 4.** Multivariable-adjusted cubic spline analysis of dietary pattern scores with the risk
- 22 of polyps
- 23 **Supplementary Figure 5.** Multivariable-adjusted cubic spline analysis of dietary pattern scores with the risk
- 24 of adenomas
- 25 **Supplementary Figure 6.** Multivariable-adjusted cubic spline analysis of dietary pattern scores with the risk
- 26 of irritable bowel syndrome
- 27 **Supplementary Figure 7.** Multivariable-adjusted cubic spline analysis of dietary pattern scores with the risk
- 28 of gastroesophageal reflux disease
- 29 **Supplementary Figure 8.** Multivariable-adjusted cubic spline analysis of dietary pattern scores with the risk
- 30 of peptic ulcer disease
- 31 **Supplementary Figure 9.** The associations between dietary patterns and gastrointestinal disorders in
- 32 subgroups
- 33 **Supplementary Figure 10.** Associations of AHEI-2010, AMED and DASH with gastrointestinal disorders
- 34 after removing food group components
- 35 **Reference**

## 36 **Supplementary Methods 1. Dietary assessment**

37 The 24-hour dietary assessments of UK Biobank collected the consumption of up to 206 types of foods and 32 types of drinks  
38 during the previous 24 hours since recruitment<sup>1</sup>. Participants recorded the intake for each food item with standard portion size. The  
39 total intake of nutrients was computed by summing up the nutrient content of each contributing food item multiplied by its  
40 consumption daily. The total energy intake was calculated by summing up the calorie contributed from each food item multiplied by  
41 its consumption daily.

42 **Supplementary Methods 2. Outcome ascertainment**

43 ICD-10 codes of IBD were K500, K501, K508-K515, K518 and K519. ICD-10 codes of polyps were K621 and K635. ICD-10  
44 codes of adenomas were D122-D126. ICD-10 codes of IBS were K580 and K589. ICD-10 codes of GORD were K210 and K219.  
45 ICD-10 codes of PUD were K250-K257, K259-K267, K269-K277, K279-K287 and K289.

46 **Supplementary Methods 3. Assessment of covariates**

47 Age, sex and race were obtained at baseline. Body mass index (BMI) was calculated as weight divided by height squared ( $\text{kg}/\text{m}^2$ )  
48 during the initial Assessment Centre visit. Physical activity was assessed by the International Physical Activity Questionnaire (IPAQ)  
49 and metabolic equivalent task (MET) score was calculated using the IPAQ guideline<sup>2,3</sup>. Smoking status, alcohol intake, regular  
50 multivitamin use, regular aspirin use, and regular nonsteroidal anti-inflammatory drugs (NSAID) use were obtained from the  
51 Touchscreen questionnaire.

52 The race was classified as white, black, Asian, mixed, or others in UK Biobank. Body mass index (BMI) was classified as  $<18.5$ ,  
53  $18.5\text{-}24.9$ ,  $25.0\text{-}29.9$ , or  $\geq 30.0$   $\text{kg}/\text{m}^2$ . Physical activity was grouped by trisecting the metabolic equivalent of task hours per week.  
54 Smoking status was classified as never, current, or former smoker. Alcohol drinking status was classified as none drinking,  
55 moderate drinking ( $<2$  drinks/day for men, and  $<1$  drink/day for women), or heavy drinking ( $\geq 2$  drinks/day for men, and  $\geq 1$   
56 drink/day for women). Regular multivitamin use, regular aspirin use, and regular nonsteroidal antiinflammatory drugs (NSAID) use  
57 were classified as use and non-use.

#### 58 **Supplementary Methods 4. Statistical analysis**

59 Subgroup analyses stratified by age (<55 years and ≥55 years), sex (male and female), BMI (<25 kg/m<sup>2</sup> and ≥ 25 kg/m<sup>2</sup>), educational  
60 level (less than high school education, high school degree, college or university degree), physical activity (grouped by trisecting the  
61 metabolic equivalent of task hours per week), smoking status (never/former and current smoker), age at onset of GI disorders (<50  
62 years and ≥55 years), Townsend deprivation index (grouped according to trisections) were conducted to test the potential  
63 heterogeneity. Subgroup analyses compared the highest with the lowest quartile of dietary pattern scores.

64 To assess the robustness of the results, sensitivity analyses were further performed by removing alcohol component from dietary  
65 patterns, removing participants with incidental GI disorders in the previous two years of follow-up to lessen the probability of reverse  
66 causation, removing BMI from the covariate list because of its possible mediation effect, or further adjusting for the number of  
67 completed dietary surveys.

68 In the analyses of examining the relationships between dietary patterns and incident risk of GI multi-morbidity, we defined the  
69 outcomes as developing only one GI disorder, developing two GI disorders, and developing three or over GI disorders. Relative  
70 risks (RRs) and 95% CIs were calculated by modified Poisson regression model<sup>4</sup>. The covariate adjustment was consistent with the  
71 multivariable Cox regression model. P for trend was calculated by logistic regression models.

72 **Supplementary Table 1. Details of dietary patterns**

| <b>Dietary patterns</b> |                                                                                                                                                                                                                                                                                                                                                                                                                                                                                                         |                                |                                 |
|-------------------------|---------------------------------------------------------------------------------------------------------------------------------------------------------------------------------------------------------------------------------------------------------------------------------------------------------------------------------------------------------------------------------------------------------------------------------------------------------------------------------------------------------|--------------------------------|---------------------------------|
| <b>AHEI-2010</b>        | Higher points assigned to (1) greater intakes of fruits, vegetables, whole grains, nuts and legumes, long chain omega-3 fatty acids, and polyunsaturated fatty acids; (2) lower intakes of red and processed meats, sugar-sweetened beverages and fruit juices, trans fat, sodium; and (3) moderate intake of alcohol <sup>5,6</sup> .                                                                                                                                                                  |                                |                                 |
|                         | Scoring method of AHEI-2010 <sup>5</sup> : All components were scored from 0 (unhealthy) to 10 (healthiest), and the total score ranged from 0 (non-adherence) to 100 (perfect adherence). The components and criteria for scoring of AHEI-2010 are listed in the following table. Taking vegetables intake as an example, if a participant ate 3 servings of vegetables per day, his score on the entry for vegetables would be 3 divided by 5 (criteria for maximum score) and then multiplied by 10. |                                |                                 |
|                         | Component                                                                                                                                                                                                                                                                                                                                                                                                                                                                                               | Criteria for minimum score (0) | Criteria for maximum score (10) |
|                         | Vegetables, servings/d                                                                                                                                                                                                                                                                                                                                                                                                                                                                                  | 0                              | ≥5                              |
|                         | Fruit, servings/d                                                                                                                                                                                                                                                                                                                                                                                                                                                                                       | 0                              | ≥4                              |
|                         | Whole grains, g/d                                                                                                                                                                                                                                                                                                                                                                                                                                                                                       |                                |                                 |
|                         | Women                                                                                                                                                                                                                                                                                                                                                                                                                                                                                                   | 0                              | 75                              |
|                         | Men                                                                                                                                                                                                                                                                                                                                                                                                                                                                                                     | 0                              | 90                              |
|                         | Sugar-sweetened beverages and fruit juice, servings/d                                                                                                                                                                                                                                                                                                                                                                                                                                                   | ≥1                             | 0                               |
|                         | Nuts and legumes, servings/d                                                                                                                                                                                                                                                                                                                                                                                                                                                                            | 0                              | ≥1                              |
|                         | Red/processed meat, servings/d                                                                                                                                                                                                                                                                                                                                                                                                                                                                          | ≥1.5                           | 0                               |
|                         | <i>trans</i> Fat, % of energy                                                                                                                                                                                                                                                                                                                                                                                                                                                                           | ≥4                             | ≤0.5                            |
|                         | Long-chain (n-3) fats (EPA + DHA), mg/d                                                                                                                                                                                                                                                                                                                                                                                                                                                                 | 0                              | 250                             |
|                         | PUFA, % of energy                                                                                                                                                                                                                                                                                                                                                                                                                                                                                       | ≤2                             | ≥10                             |
|                         | Sodium, mg/d                                                                                                                                                                                                                                                                                                                                                                                                                                                                                            | Highest decile                 | Lowest decile                   |
|                         | Alcohol, drinks/d                                                                                                                                                                                                                                                                                                                                                                                                                                                                                       |                                |                                 |
|                         | Women                                                                                                                                                                                                                                                                                                                                                                                                                                                                                                   | ≥2.5                           | 0.5–1.5                         |
|                         | Men                                                                                                                                                                                                                                                                                                                                                                                                                                                                                                     | ≥3.5                           | 0.5–2.0                         |
| <b>AMED</b>             | Higher points assigned to (1) greater intakes of fruits, vegetables, whole grains, nuts, legumes, fish and seafood, and ratio of monounsaturated to saturated fatty acids; (2) lower intakes of red and processed meats; and (3) moderate intake of alcohol <sup>6,7</sup> .                                                                                                                                                                                                                            |                                |                                 |
|                         | Scoring method of AMED: For fruits, vegetables, whole grains, nuts, legumes, fish and seafood, and ratio of monounsaturated to saturated fatty acids, participants with intake above the median intake received 1 point; otherwise they received 0 points. red and processed meats consumption below the median received 1 point. Alcohol intake between 5 and 15 g/d received 1 point.                                                                                                                 |                                |                                 |
| <b>DASH</b>             | Higher points assigned to (1) greater intakes of fruits, vegetables, whole grains, nuts and legumes, and low-fat dairy; and (2) lower intakes of red and processed meats, sugar-sweetened beverages, and sodium <sup>6,8</sup> .                                                                                                                                                                                                                                                                        |                                |                                 |

|             |                                                                                                                                                                                                                                                                                                                                                                                                                                                                                                                                                                                                                                                                                                                                                                                                                                                                                                                                                                                                                                                                                                                                                 |
|-------------|-------------------------------------------------------------------------------------------------------------------------------------------------------------------------------------------------------------------------------------------------------------------------------------------------------------------------------------------------------------------------------------------------------------------------------------------------------------------------------------------------------------------------------------------------------------------------------------------------------------------------------------------------------------------------------------------------------------------------------------------------------------------------------------------------------------------------------------------------------------------------------------------------------------------------------------------------------------------------------------------------------------------------------------------------------------------------------------------------------------------------------------------------|
|             | Scoring method of DASH: For each of the components, we classified participants into quintiles according to their intake ranking. Component score for fruits, vegetables, nuts and legumes, low-fat dairy products, and whole grains is the participants' quintile ranking. For example, quintile 1 was assigned 1 point and quintile 5, 5 points. For sodium, red and processed meats, and sweetened beverages, low intake was desired. Therefore, the lowest quintile was given a score of 5 points and the highest quintile, 1 point. We then summed up the component scores to obtain an overall <sup>8</sup> .                                                                                                                                                                                                                                                                                                                                                                                                                                                                                                                              |
| <b>PDIs</b> | Higher points assigned to (1) greater intakes of fruits, vegetables, whole grains, nuts, legumes, tea and coffee, and vegetable oils; (2) lower intakes of meats, eggs, fish and seafood, miscellaneous animal-based foods, dairy, and animal fat; and (3) higher intakes (PDI, unhealthful PDI) or lower intakes (healthful PDI) of potatoes, refined grains, sugar-sweetened beverages, fruit juices, sweets and desserts <sup>6,9</sup> . The detailed calculations are as follows:                                                                                                                                                                                                                                                                                                                                                                                                                                                                                                                                                                                                                                                          |
|             | Scoring method of PDIs: For PDI, participants received a score of 5 for each plant food group for which they were above the highest quintile of consumption, a score of 4 for each plant food group for which they were above the second highest quintile but below the highest quintile, and so on, with a score of 1 for consumption below the lowest quintile (positive scores). On the other hand, participants received a score of 1 for each animal food group for which they were above the highest quintile of consumption, a score of 2 for each animal food group for which they were between the highest and second highest quintiles, and so on, with a score of 5 for consumption below the lowest quintile (reverse scores). For hPDI, positive scores were given to healthy plant food groups, and reverse scores to less healthy plant food groups and animal food groups. Finally, for uPDI, positive scores were given to less healthy plant food groups, and reverse scores to healthy plant food groups and animal food groups. The 18 food group scores for an individual were summed to obtain the indices <sup>9</sup> . |
| <b>LCDs</b> | Higher points assigned to (1) greater intakes of protein (animal protein for Animal-rich LCD, plant protein for Plant-rich LCD), and fat (animal fat for Animal-rich LCD, plant fat for Plant-rich LCD); and (2) lower intakes of carbohydrate <sup>6,10</sup> .                                                                                                                                                                                                                                                                                                                                                                                                                                                                                                                                                                                                                                                                                                                                                                                                                                                                                |
|             | Scoring method of LCDs: We divided the study participants into 11 strata each of fat, protein, and carbohydrate intake, expressed as a percentage of energy. For fat and protein, participants in the highest stratum received 10 points for that macronutrient, participants in the next stratum received 9 points, and so on down to participants in the lowest stratum, who received 0 points. For carbohydrate, the order of the strata was reversed. The points for each of the three macronutrients were then summed to create the overall diet score. The animal-rich LCD was calculated according to the percentage of energy as carbohydrate, the percentage of energy as animal protein, and the percentage of energy as animal fat. The plant-rich LCD was calculated according to the percentage of energy as carbohydrate, the percentage of energy as vegetable protein, and the percentage of energy as vegetable fat <sup>10</sup> .                                                                                                                                                                                            |

|              |                                                                                                                                                                                                                                                                                                                                                                                                                                                                                                                                                                                                     |                                      |        |          |      |              |      |     |   |
|--------------|-----------------------------------------------------------------------------------------------------------------------------------------------------------------------------------------------------------------------------------------------------------------------------------------------------------------------------------------------------------------------------------------------------------------------------------------------------------------------------------------------------------------------------------------------------------------------------------------------------|--------------------------------------|--------|----------|------|--------------|------|-----|---|
| <b>GDQSS</b> | Higher points assigned to (1) greater intakes of cruciferous vegetables, deep orange vegetables, other vegetables, deep orange tubers, citrus fruits, deep orange fruits, other fruits, dark green leafy vegetables, whole grains, legumes, liquid oils, nuts and seeds, poultry and game meat, fish and shellfish, eggs, and low-fat dairy; (2) moderate intakes of high-fat dairy, and red meat; and (3) lower intakes of deep- fried foods, refined grains and baked goods, white roots and tubers, sweets and ice cream, processed meat, sugar-sweetened beverages, and juice <sup>6,11</sup> . |                                      |        |          |      |              |      |     |   |
|              | The GDQS is obtained by summing points across all of the 25 food groups, ranges from 0 to 49. The GDQS+ submetric includes the 16 healthy food groups included in the GDQS, is scored with the same categories of consumed amounts used in the GDQS, and ranges from 0 to 32. The GDQS- submetric includes the 9 GDQS food groups classified as unhealthy or unhealthy in excessive amounts, is scored with the same categories of consumed amounts used in the GDQS, and ranges from 0 to 17 <sup>11</sup> .                                                                                       |                                      |        |          |      |              |      |     |   |
|              | Scoring method of GDQSS <sup>11</sup> :                                                                                                                                                                                                                                                                                                                                                                                                                                                                                                                                                             |                                      |        |          |      |              |      |     |   |
|              |                                                                                                                                                                                                                                                                                                                                                                                                                                                                                                                                                                                                     | Categories of consumed amounts (g/d) |        |          |      | Point values |      |     |   |
|              | Food group                                                                                                                                                                                                                                                                                                                                                                                                                                                                                                                                                                                          | 1                                    | 2      | 3        | 4    | 1            | 2    | 3   | 4 |
|              | Healthy                                                                                                                                                                                                                                                                                                                                                                                                                                                                                                                                                                                             |                                      |        |          |      |              |      |     |   |
|              | Citrus fruits                                                                                                                                                                                                                                                                                                                                                                                                                                                                                                                                                                                       | <24                                  | 24-69  | >69      |      | 0            | 1    | 2   |   |
|              | Deep orange fruits                                                                                                                                                                                                                                                                                                                                                                                                                                                                                                                                                                                  | <25                                  | 25-123 | >123     |      | 0            | 1    | 2   |   |
|              | Other fruits                                                                                                                                                                                                                                                                                                                                                                                                                                                                                                                                                                                        | <27                                  | 27-107 | >107     |      | 0            | 1    | 2   |   |
|              | Dark green leafy vegetables                                                                                                                                                                                                                                                                                                                                                                                                                                                                                                                                                                         | <13                                  | 13-37  | >37      |      | 0            | 2    | 4   |   |
|              | Cruciferous vegetables                                                                                                                                                                                                                                                                                                                                                                                                                                                                                                                                                                              | <13                                  | 13-36  | >36      |      | 0            | 0.25 | 0.5 |   |
|              | Deep orange vegetables                                                                                                                                                                                                                                                                                                                                                                                                                                                                                                                                                                              | <9                                   | 9-45   | >45      |      | 0            | 0.25 | 0.5 |   |
|              | Other vegetables                                                                                                                                                                                                                                                                                                                                                                                                                                                                                                                                                                                    | <23                                  | 23-114 | >114     |      | 0            | 0.25 | 0.5 |   |
|              | Legumes                                                                                                                                                                                                                                                                                                                                                                                                                                                                                                                                                                                             | <9                                   | 9-42   | >42      |      | 0            | 2    | 4   |   |
|              | Deep orange tubers                                                                                                                                                                                                                                                                                                                                                                                                                                                                                                                                                                                  | <12                                  | 12-63  | >63      |      | 0            | 0.25 | 0.5 |   |
|              | Nuts and seeds                                                                                                                                                                                                                                                                                                                                                                                                                                                                                                                                                                                      | <7                                   | 7-13   | >13      |      | 0            | 2    | 4   |   |
|              | Whole grains                                                                                                                                                                                                                                                                                                                                                                                                                                                                                                                                                                                        | <8                                   | 8-13   | >13      |      | 0            | 1    | 2   |   |
|              | Liquid oils                                                                                                                                                                                                                                                                                                                                                                                                                                                                                                                                                                                         | <2                                   | 2-7.5  | >7.5     |      | 0            | 1    | 2   |   |
|              | Fish and shellfish                                                                                                                                                                                                                                                                                                                                                                                                                                                                                                                                                                                  | <14                                  | 14-71  | >71      |      | 0            | 1    | 2   |   |
|              | Poultry and game meat                                                                                                                                                                                                                                                                                                                                                                                                                                                                                                                                                                               | <16                                  | 16-44  | >44      |      | 0            | 1    | 2   |   |
|              | Low fat dairy                                                                                                                                                                                                                                                                                                                                                                                                                                                                                                                                                                                       | <33                                  | 33-132 | >132     |      | 0            | 1    | 2   |   |
|              | Eggs                                                                                                                                                                                                                                                                                                                                                                                                                                                                                                                                                                                                | <6                                   | 6-32   | >32      |      | 0            | 1    | 2   |   |
|              | Unhealthy in excessive amounts                                                                                                                                                                                                                                                                                                                                                                                                                                                                                                                                                                      |                                      |        |          |      |              |      |     |   |
|              | High fat dairy (in milk equivalent)                                                                                                                                                                                                                                                                                                                                                                                                                                                                                                                                                                 | <35                                  | 35-142 | ≥142-734 | >734 | 0            | 1    | 2   | 0 |
|              | Red meat                                                                                                                                                                                                                                                                                                                                                                                                                                                                                                                                                                                            | <9                                   | 9-46   | >46      |      | 2            | 1    | 0   |   |
|              | Unhealthy                                                                                                                                                                                                                                                                                                                                                                                                                                                                                                                                                                                           |                                      |        |          |      |              |      |     |   |
|              | Processed meat                                                                                                                                                                                                                                                                                                                                                                                                                                                                                                                                                                                      | <9                                   | 9-30   | >30      |      | 2            | 1    | 0   |   |



|            |                                                                                                                                                                                                                                                                                                                                                                                                                                                                                                                                                                                                                                                                                                                                                                                                                                                                                                                                                                                                                                                                                     |                                   |        |                                    |  |                    |   |   |  |
|------------|-------------------------------------------------------------------------------------------------------------------------------------------------------------------------------------------------------------------------------------------------------------------------------------------------------------------------------------------------------------------------------------------------------------------------------------------------------------------------------------------------------------------------------------------------------------------------------------------------------------------------------------------------------------------------------------------------------------------------------------------------------------------------------------------------------------------------------------------------------------------------------------------------------------------------------------------------------------------------------------------------------------------------------------------------------------------------------------|-----------------------------------|--------|------------------------------------|--|--------------------|---|---|--|
|            | Refined grains and baked goods                                                                                                                                                                                                                                                                                                                                                                                                                                                                                                                                                                                                                                                                                                                                                                                                                                                                                                                                                                                                                                                      | <7                                | 7-33   | >33                                |  | 2                  | 1 | 0 |  |
|            | Sweets and ice cream                                                                                                                                                                                                                                                                                                                                                                                                                                                                                                                                                                                                                                                                                                                                                                                                                                                                                                                                                                                                                                                                | <13                               | 13-37  | >37                                |  | 2                  | 1 | 0 |  |
|            | Sugar-sweetened beverages                                                                                                                                                                                                                                                                                                                                                                                                                                                                                                                                                                                                                                                                                                                                                                                                                                                                                                                                                                                                                                                           | <57                               | 57-180 | >180                               |  | 2                  | 1 | 0 |  |
|            | Juice                                                                                                                                                                                                                                                                                                                                                                                                                                                                                                                                                                                                                                                                                                                                                                                                                                                                                                                                                                                                                                                                               | <36                               | 36-144 | >144                               |  | 2                  | 1 | 0 |  |
|            | White roots and tubers                                                                                                                                                                                                                                                                                                                                                                                                                                                                                                                                                                                                                                                                                                                                                                                                                                                                                                                                                                                                                                                              | <27                               | 27-107 | >107                               |  | 2                  | 1 | 0 |  |
|            | Purchased deep fried foods                                                                                                                                                                                                                                                                                                                                                                                                                                                                                                                                                                                                                                                                                                                                                                                                                                                                                                                                                                                                                                                          | <9                                | 9-45   | >45                                |  | 2                  | 1 | 0 |  |
| <b>DII</b> | We used the DII calculation method developed by Shivappa et al <sup>12</sup> . The DII for this study was computed using data on 31 out of the 45 variables including pro-inflammatory components (vitamin B <sub>12</sub> , carbohydrate, cholesterol, energy, fat, iron, protein, saturated fat, trans fat) and anti-inflammatory components [alcohol, vitamin B <sub>6</sub> , β-Carotene, fiber, folic acid, garlic, Mg, monounsaturated fat (MUFA), niacin, n-3 fatty acids, n-6 fatty acids, onion, PUFA, riboflavin, Se, thiamin, vitamin A, vitamin C, vitamin E, vitamin D, Zn, pepper].                                                                                                                                                                                                                                                                                                                                                                                                                                                                                   |                                   |        |                                    |  |                    |   |   |  |
|            | Scoring method of DII: Calculation of the DII is based on dietary intake data that are then linked to the regionally representative world database which provided a robust estimate of a mean and standard deviation for each parameter. First, we subtracted the 'global daily mean intake' from the intake participants reported and divided this value by its standard deviation. To minimize the effect of 'right skewing', this value was converted to a percentile score. Each percentile score was doubled and then '1' was subtracted. The centred percentile value for each food parameter was then multiplied by its respective 'overall food parameter-specific inflammatory effect score' to obtain the 'food parameter-specific DII score'. Finally, all of the 'food parameter-specific DII scores' were summed to create the 'overall DII score' for an individual <sup>12</sup> . Food parameters included in the dietary inflammatory index, inflammatory effect scores, and intake values from the global composite data set are shown as follows <sup>12</sup> : |                                   |        |                                    |  |                    |   |   |  |
|            | Food parameters                                                                                                                                                                                                                                                                                                                                                                                                                                                                                                                                                                                                                                                                                                                                                                                                                                                                                                                                                                                                                                                                     | Overall inflammatory effect score |        | Global daily mean intake (units/d) |  | Standard deviation |   |   |  |
|            | Alcohol (g)                                                                                                                                                                                                                                                                                                                                                                                                                                                                                                                                                                                                                                                                                                                                                                                                                                                                                                                                                                                                                                                                         | -0.278                            |        | 13.98                              |  | 3.72               |   |   |  |
|            | Vitamin B12 (mg)                                                                                                                                                                                                                                                                                                                                                                                                                                                                                                                                                                                                                                                                                                                                                                                                                                                                                                                                                                                                                                                                    | 0.106                             |        | 5.15                               |  | 2.70               |   |   |  |
|            | Vitamin B6 (mg)                                                                                                                                                                                                                                                                                                                                                                                                                                                                                                                                                                                                                                                                                                                                                                                                                                                                                                                                                                                                                                                                     | -0.365                            |        | 1.47                               |  | 0.74               |   |   |  |
|            | β-Carotene (mg)                                                                                                                                                                                                                                                                                                                                                                                                                                                                                                                                                                                                                                                                                                                                                                                                                                                                                                                                                                                                                                                                     | -0.584                            |        | 3718                               |  | 1720               |   |   |  |
|            | Caffeine (g)                                                                                                                                                                                                                                                                                                                                                                                                                                                                                                                                                                                                                                                                                                                                                                                                                                                                                                                                                                                                                                                                        | -0.110                            |        | 8.05                               |  | 6.67               |   |   |  |
|            | Carbohydrate (g)                                                                                                                                                                                                                                                                                                                                                                                                                                                                                                                                                                                                                                                                                                                                                                                                                                                                                                                                                                                                                                                                    | 0.097                             |        | 272.2                              |  | 40.0               |   |   |  |
|            | Cholesterol (mg)                                                                                                                                                                                                                                                                                                                                                                                                                                                                                                                                                                                                                                                                                                                                                                                                                                                                                                                                                                                                                                                                    | 0.110                             |        | 279.4                              |  | 51.2               |   |   |  |
|            | Energy (kcal)                                                                                                                                                                                                                                                                                                                                                                                                                                                                                                                                                                                                                                                                                                                                                                                                                                                                                                                                                                                                                                                                       | 0.180                             |        | 2056                               |  | 338                |   |   |  |
|            | Eugenol (mg)                                                                                                                                                                                                                                                                                                                                                                                                                                                                                                                                                                                                                                                                                                                                                                                                                                                                                                                                                                                                                                                                        | -0.140                            |        | 0.01                               |  | 0.08               |   |   |  |
|            | Total fat (g)                                                                                                                                                                                                                                                                                                                                                                                                                                                                                                                                                                                                                                                                                                                                                                                                                                                                                                                                                                                                                                                                       | 0.298                             |        | 71.4                               |  | 19.4               |   |   |  |
|            | Fibre (g)                                                                                                                                                                                                                                                                                                                                                                                                                                                                                                                                                                                                                                                                                                                                                                                                                                                                                                                                                                                                                                                                           | -0.663                            |        | 18.8                               |  | 4.9                |   |   |  |
|            | Folic acid (mg)                                                                                                                                                                                                                                                                                                                                                                                                                                                                                                                                                                                                                                                                                                                                                                                                                                                                                                                                                                                                                                                                     | -0.190                            |        | 273.0                              |  | 70.7               |   |   |  |
|            | Garlic (g)                                                                                                                                                                                                                                                                                                                                                                                                                                                                                                                                                                                                                                                                                                                                                                                                                                                                                                                                                                                                                                                                          | -0.412                            |        | 4.35                               |  | 2.90               |   |   |  |
|            | Ginger (g)                                                                                                                                                                                                                                                                                                                                                                                                                                                                                                                                                                                                                                                                                                                                                                                                                                                                                                                                                                                                                                                                          | -0.453                            |        | 59.0                               |  | 63.2               |   |   |  |

|  |                     |        |       |       |
|--|---------------------|--------|-------|-------|
|  | Fe (mg)             | 0.032  | 13.35 | 3.71  |
|  | Mg (mg)             | -0.484 | 310.1 | 139.4 |
|  | MUFA (g)            | -0.009 | 27.0  | 6.1   |
|  | Niacin (mg)         | -0.246 | 25.9  | 11.77 |
|  | n-3 Fatty acids (g) | -0.436 | 1.06  | 1.06  |
|  | n-6 Fatty acids (g) | -0.159 | 10.80 | 7.50  |
|  | Onion (g)           | -0.301 | 35.9  | 18.4  |
|  | Protein (g)         | 0.021  | 79.4  | 13.9  |
|  | PUFA (g)            | -0.337 | 13.88 | 3.76  |
|  | Riboflavin (mg)     | -0.068 | 1.70  | 0.79  |
|  | Saffron (g)         | -0.140 | 0.37  | 1.78  |
|  | Saturated fat (g)   | 0.373  | 28.6  | 8.0   |
|  | Se (mg)             | -0.191 | 67.0  | 25.1  |
|  | Thiamin (mg)        | -0.098 | 1.70  | 0.66  |
|  | Trans fat (g)       | 0.229  | 3.15  | 3.75  |
|  | Turmeric (mg)       | -0.785 | 533.6 | 754.3 |
|  | Vitamin A (RE)      | -0.401 | 983.9 | 518.6 |
|  | Vitamin C (mg)      | -0.424 | 118.2 | 43.46 |
|  | Vitamin D (mg)      | -0.446 | 6.26  | 2.21  |
|  | Vitamin E (mg)      | -0.419 | 8.73  | 1.49  |
|  | Zn (mg)             | -0.313 | 9.84  | 2.19  |
|  | Green/black tea (g) | -0.536 | 1.69  | 1.53  |
|  | Flavan-3-ol (mg)    | -0.415 | 95.8  | 85.9  |
|  | Flavones (mg)       | -0.616 | 1.55  | 0.07  |
|  | Flavonols (mg)      | -0.467 | 17.70 | 6.79  |
|  | Flavonones (mg)     | -0.250 | 11.70 | 3.82  |
|  | Anthocyanidins (mg) | -0.131 | 18.05 | 21.14 |
|  | Isoflavones (mg)    | -0.593 | 1.20  | 0.20  |
|  | Pepper (g)          | -0.131 | 10.00 | 7.07  |
|  | Thyme/oregano (mg)  | -0.102 | 0.33  | 0.99  |
|  | Rosemary (mg)       | -0.013 | 1.00  | 15.00 |

73 Abbreviations: AHEI-2010, Alternate Healthy Eating Index-2010; AMED, Alternate Mediterranean Diet; DASH, Dietary Approaches to Stop  
74 Hypertension; DII, dietary inflammatory index; GDQS, Global Diet Quality Score; GDQS-, negative submetric of Global Diet Quality Score; GDQS+,  
75 positive submetric of Global Diet Quality Score; hPDI, healthful plant-based diet index; LCD, low carbohydrate diet; PDI, plant-based diet index; uPDI,  
76 unhealthful plant-based diet index.

77 **Supplementary Table 2. Associations between dietary patterns and gastrointestinal disorders risk**

| Dietary patterns     |           | HR (95% CI) <sup>a</sup>             |                                    |                    |                    |                                   |                                          |                               |
|----------------------|-----------|--------------------------------------|------------------------------------|--------------------|--------------------|-----------------------------------|------------------------------------------|-------------------------------|
|                      |           | Gastrointestinal disorders (n=20858) | Inflammatory bowel disease (n=666) | Polyps (n=6910)    | Adenomas (n=4254)  | Irritable bowel syndrome (n=2232) | Gastroesophageal reflux disease (n=9942) | Peptic ulcer disease (n=1713) |
| AHEI-2010            |           |                                      |                                    |                    |                    |                                   |                                          |                               |
| Model 1 <sup>b</sup> | Quarter 1 | 1 (Ref)                              | 1 (Ref)                            | 1 (Ref)            | 1 (Ref)            | 1 (Ref)                           | 1 (Ref)                                  | 1 (Ref)                       |
|                      | Quarter 2 | 0.92 (0.89, 0.95)*                   | 0.94 (0.77, 1.15)                  | 0.90 (0.84, 0.96)* | 0.94 (0.87, 1.02)  | 0.92 (0.81, 1.03)                 | 0.89 (0.85, 0.94)*                       | 0.87 (0.77, 0.99)*            |
|                      | Quarter 3 | 0.84 (0.81, 0.88)*                   | 0.80 (0.64, 0.99)*                 | 0.81 (0.76, 0.86)* | 0.86 (0.79, 0.94)* | 0.93 (0.82, 1.04)                 | 0.84 (0.79, 0.88)*                       | 0.80 (0.70, 0.91)*            |
|                      | Quarter 4 | 0.78 (0.75, 0.81)*                   | 0.70 (0.56, 0.88)*                 | 0.76 (0.71, 0.81)* | 0.80 (0.73, 0.87)* | 0.84 (0.75, 0.95)*                | 0.78 (0.73, 0.82)*                       | 0.73 (0.63, 0.84)*            |
| Model 2 <sup>c</sup> | Quarter 1 | 1 (Ref)                              | 1 (Ref)                            | 1 (Ref)            | 1 (Ref)            | 1 (Ref)                           | 1 (Ref)                                  | 1 (Ref)                       |
|                      | Quarter 2 | 0.95 (0.92, 0.99)*                   | 0.97 (0.79, 1.19)                  | 0.95 (0.89, 1.01)  | 0.99 (0.91, 1.07)  | 0.92 (0.82, 1.04)                 | 0.92 (0.87, 0.98)*                       | 0.92 (0.80, 1.04)             |
|                      | Quarter 3 | 0.90 (0.86, 0.93)*                   | 0.84 (0.68, 1.05)                  | 0.88 (0.82, 0.94)* | 0.93 (0.86, 1.02)  | 0.94 (0.84, 1.06)                 | 0.89 (0.84, 0.94)*                       | 0.86 (0.75, 0.98)*            |
|                      | Quarter 4 | 0.86 (0.82, 0.89)*                   | 0.76 (0.60, 0.95)*                 | 0.86 (0.80, 0.92)* | 0.90 (0.82, 0.98)* | 0.86 (0.77, 0.98)*                | 0.85 (0.81, 0.90)*                       | 0.80 (0.70, 0.92)*            |
| AMED                 |           |                                      |                                    |                    |                    |                                   |                                          |                               |
| Model 1 <sup>b</sup> | Quarter 1 | 1 (Ref)                              | 1 (Ref)                            | 1 (Ref)            | 1 (Ref)            | 1 (Ref)                           | 1 (Ref)                                  | 1 (Ref)                       |
|                      | Quarter 2 | 0.93 (0.90, 0.96)*                   | 0.96 (0.78, 1.17)                  | 0.95 (0.89, 1.01)  | 0.97 (0.89, 1.05)  | 0.96 (0.86, 1.07)                 | 0.90 (0.86, 0.95)*                       | 0.81 (0.71, 0.91)*            |
|                      | Quarter 3 | 0.86 (0.82, 0.89)*                   | 0.93 (0.73, 1.18)                  | 0.86 (0.79, 0.92)* | 0.90 (0.82, 0.99)* | 0.87 (0.76, 1.00)*                | 0.83 (0.78, 0.89)*                       | 0.74 (0.64, 0.86)*            |
|                      | Quarter 4 | 0.78 (0.75, 0.81)*                   | 0.71 (0.56, 0.90)*                 | 0.79 (0.73, 0.85)* | 0.83 (0.76, 0.91)* | 0.84 (0.74, 0.96)*                | 0.75 (0.71, 0.79)*                       | 0.71 (0.61, 0.81)*            |
| Model 2 <sup>c</sup> | Quarter 1 | 1 (Ref)                              | 1 (Ref)                            | 1 (Ref)            | 1 (Ref)            | 1 (Ref)                           | 1 (Ref)                                  | 1 (Ref)                       |
|                      | Quarter 2 | 0.96 (0.92, 0.99)*                   | 0.97 (0.80, 1.19)                  | 0.98 (0.92, 1.05)  | 1.00 (0.92, 1.08)  | 0.97 (0.86, 1.08)                 | 0.93 (0.88, 0.98)*                       | 0.84 (0.74, 0.95)*            |
|                      | Quarter 3 | 0.90 (0.86, 0.94)*                   | 0.95 (0.75, 1.21)                  | 0.90 (0.84, 0.98)* | 0.95 (0.86, 1.05)  | 0.88 (0.77, 1.01)                 | 0.88 (0.82, 0.93)*                       | 0.78 (0.67, 0.91)*            |
|                      | Quarter 4 | 0.85 (0.81, 0.88)*                   | 0.74 (0.58, 0.94)*                 | 0.87 (0.81, 0.93)* | 0.92 (0.83, 1.01)  | 0.86 (0.76, 0.98)*                | 0.82 (0.77, 0.88)*                       | 0.78 (0.67, 0.90)*            |
| DASH                 |           |                                      |                                    |                    |                    |                                   |                                          |                               |
| Model 1 <sup>b</sup> | Quarter 1 | 1 (Ref)                              | 1 (Ref)                            | 1 (Ref)            | 1 (Ref)            | 1 (Ref)                           | 1 (Ref)                                  | 1 (Ref)                       |
|                      | Quarter 2 | 0.91 (0.88, 0.95)*                   | 0.82 (0.67, 1.02)                  | 0.91 (0.85, 0.97)* | 0.94 (0.87, 1.02)  | 1.01 (0.89, 1.14)                 | 0.91 (0.86, 0.96)*                       | 0.86 (0.75, 0.98)*            |
|                      | Quarter 3 | 0.83 (0.80, 0.86)*                   | 0.74 (0.61, 0.91)*                 | 0.80 (0.75, 0.85)* | 0.82 (0.76, 0.89)* | 0.90 (0.80, 1.01)                 | 0.84 (0.80, 0.89)*                       | 0.75 (0.66, 0.85)*            |
|                      | Quarter 4 | 0.76 (0.73, 0.80)*                   | 0.72 (0.57, 0.90)*                 | 0.74 (0.69, 0.80)* | 0.75 (0.69, 0.82)* | 0.81 (0.71, 0.92)*                | 0.77 (0.73, 0.82)*                       | 0.67 (0.58, 0.77)*            |
| Model 3 <sup>d</sup> | Quarter 1 | 1 (Ref)                              | 1 (Ref)                            | 1 (Ref)            | 1 (Ref)            | 1 (Ref)                           | 1 (Ref)                                  | 1 (Ref)                       |
|                      | Quarter 2 | 0.95 (0.92, 0.99)*                   | 0.86 (0.69, 1.06)                  | 0.97 (0.91, 1.03)  | 1.00 (0.92, 1.09)  | 1.01 (0.89, 1.14)                 | 0.94 (0.88, 0.99)*                       | 0.90 (0.79, 1.03)             |

| Dietary patterns     |           | HR (95% CI) <sup>a</sup>             |                                    |                    |                    |                                   |                                          |                               |
|----------------------|-----------|--------------------------------------|------------------------------------|--------------------|--------------------|-----------------------------------|------------------------------------------|-------------------------------|
|                      |           | Gastrointestinal disorders (n=20858) | Inflammatory bowel disease (n=666) | Polyps (n=6910)    | Adenomas (n=4254)  | Irritable bowel syndrome (n=2232) | Gastroesophageal reflux disease (n=9942) | Peptic ulcer disease (n=1713) |
|                      | Quarter 3 | 0.89 (0.86, 0.93)*                   | 0.79 (0.64, 0.97)*                 | 0.89 (0.83, 0.95)* | 0.91 (0.84, 0.99)* | 0.90 (0.80, 1.01)                 | 0.89 (0.84, 0.94)*                       | 0.82 (0.72, 0.93)*            |
|                      | Quarter 4 | 0.85 (0.81, 0.88)*                   | 0.79 (0.62, 0.99)*                 | 0.87 (0.80, 0.93)* | 0.88 (0.80, 0.96)* | 0.81 (0.72, 0.92)*                | 0.85 (0.80, 0.90)*                       | 0.75 (0.65, 0.87)*            |
| PDI                  |           |                                      |                                    |                    |                    |                                   |                                          |                               |
| Model 1 <sup>b</sup> | Quarter 1 | 1 (Ref)                              | 1 (Ref)                            | 1 (Ref)            | 1 (Ref)            | 1 (Ref)                           | 1 (Ref)                                  | 1 (Ref)                       |
|                      | Quarter 2 | 0.96 (0.93, 1.00)                    | 0.90 (0.73, 1.11)                  | 0.97 (0.90, 1.03)  | 0.99 (0.91, 1.08)  | 0.89 (0.79, 1.01)                 | 0.99 (0.94, 1.05)                        | 0.84 (0.74, 0.96)*            |
|                      | Quarter 3 | 0.89 (0.86, 0.92)*                   | 0.87 (0.71, 1.07)                  | 0.88 (0.82, 0.93)* | 0.88 (0.81, 0.95)* | 0.91 (0.81, 1.02)                 | 0.91 (0.86, 0.96)*                       | 0.77 (0.68, 0.88)*            |
|                      | Quarter 4 | 0.86 (0.83, 0.90)*                   | 0.79 (0.63, 0.98)*                 | 0.83 (0.78, 0.89)* | 0.79 (0.72, 0.86)* | 0.96 (0.85, 1.08)                 | 0.87 (0.83, 0.93)*                       | 0.75 (0.66, 0.86)*            |
| Model 3 <sup>d</sup> | Quarter 1 | 1 (Ref)                              | 1 (Ref)                            | 1 (Ref)            | 1 (Ref)            | 1 (Ref)                           | 1 (Ref)                                  | 1 (Ref)                       |
|                      | Quarter 2 | 0.99 (0.96, 1.03)                    | 0.92 (0.74, 1.13)                  | 1.02 (0.95, 1.08)  | 1.05 (0.96, 1.14)  | 0.89 (0.79, 1.00)*                | 1.02 (0.96, 1.08)                        | 0.87 (0.77, 1.00)*            |
|                      | Quarter 3 | 0.94 (0.90, 0.97)*                   | 0.90 (0.73, 1.11)                  | 0.95 (0.89, 1.01)  | 0.96 (0.89, 1.04)  | 0.90 (0.80, 1.01)                 | 0.95 (0.90, 1.00)                        | 0.83 (0.73, 0.95)*            |
|                      | Quarter 4 | 0.93 (0.89, 0.97)*                   | 0.82 (0.65, 1.03)                  | 0.94 (0.87, 1.01)  | 0.90 (0.82, 0.98)* | 0.94 (0.84, 1.06)                 | 0.93 (0.88, 0.99)*                       | 0.83 (0.72, 0.95)*            |
| hPDI                 |           |                                      |                                    |                    |                    |                                   |                                          |                               |
| Model 1 <sup>b</sup> | Quarter 1 | 1 (Ref)                              | 1 (Ref)                            | 1 (Ref)            | 1 (Ref)            | 1 (Ref)                           | 1 (Ref)                                  | 1 (Ref)                       |
|                      | Quarter 2 | 0.93 (0.89, 0.96)*                   | 0.86 (0.70, 1.05)                  | 0.92 (0.86, 0.98)* | 0.92 (0.85, 1.00)  | 1.00 (0.89, 1.12)                 | 0.93 (0.88, 0.98)*                       | 0.94 (0.83, 1.08)             |
|                      | Quarter 3 | 0.91 (0.87, 0.94)*                   | 0.72 (0.58, 0.90)*                 | 0.89 (0.83, 0.96)* | 0.93 (0.85, 1.01)  | 0.88 (0.78, 0.99)*                | 0.92 (0.87, 0.97)*                       | 0.94 (0.82, 1.08)             |
|                      | Quarter 4 | 0.87 (0.84, 0.91)*                   | 0.77 (0.62, 0.96)*                 | 0.84 (0.79, 0.90)* | 0.88 (0.81, 0.96)* | 0.90 (0.79, 1.01)                 | 0.90 (0.85, 0.95)*                       | 0.96 (0.84, 1.10)             |
| Model 3 <sup>d</sup> | Quarter 1 | 1 (Ref)                              | 1 (Ref)                            | 1 (Ref)            | 1 (Ref)            | 1 (Ref)                           | 1 (Ref)                                  | 1 (Ref)                       |
|                      | Quarter 2 | 0.94 (0.91, 0.98)*                   | 0.87 (0.71, 1.07)                  | 0.95 (0.89, 1.01)  | 0.94 (0.87, 1.02)  | 1.00 (0.89, 1.12)                 | 0.94 (0.89, 1.00)*                       | 0.95 (0.84, 1.09)             |
|                      | Quarter 3 | 0.93 (0.89, 0.97)*                   | 0.74 (0.59, 0.93)*                 | 0.93 (0.87, 1.00)  | 0.96 (0.88, 1.05)  | 0.87 (0.77, 0.99)*                | 0.94 (0.89, 1.00)                        | 0.95 (0.83, 1.10)             |
|                      | Quarter 4 | 0.91 (0.87, 0.95)*                   | 0.79 (0.63, 1.00)*                 | 0.90 (0.84, 0.97)* | 0.93 (0.85, 1.02)  | 0.89 (0.78, 1.01)                 | 0.93 (0.88, 0.99)*                       | 0.97 (0.84, 1.12)             |
| uPDI                 |           |                                      |                                    |                    |                    |                                   |                                          |                               |
| Model 1 <sup>b</sup> | Quarter 1 | 1 (Ref)                              | 1 (Ref)                            | 1 (Ref)            | 1 (Ref)            | 1 (Ref)                           | 1 (Ref)                                  | 1 (Ref)                       |
|                      | Quarter 2 | 1.03 (0.99, 1.07)                    | 1.08 (0.87, 1.35)                  | 1.01 (0.94, 1.08)  | 0.91 (0.84, 0.99)* | 1.09 (0.97, 1.23)                 | 1.08 (1.02, 1.14)*                       | 0.97 (0.85, 1.11)             |
|                      | Quarter 3 | 1.13 (1.09, 1.17)*                   | 1.16 (0.93, 1.46)                  | 1.08 (1.01, 1.16)* | 1.03 (0.94, 1.12)  | 1.16 (1.03, 1.31)*                | 1.19 (1.12, 1.26)*                       | 1.16 (1.02, 1.34)*            |
|                      | Quarter 4 | 1.17 (1.13, 1.22)*                   | 1.33 (1.07, 1.66)*                 | 1.06 (0.99, 1.14)  | 1.00 (0.92, 1.09)  | 1.26 (1.12, 1.42)*                | 1.28 (1.20, 1.35)*                       | 1.25 (1.09, 1.43)*            |
| Model 3 <sup>d</sup> | Quarter 1 | 1 (Ref)                              | 1 (Ref)                            | 1 (Ref)            | 1 (Ref)            | 1 (Ref)                           | 1 (Ref)                                  | 1 (Ref)                       |

| Dietary patterns     |           | HR (95% CI) <sup>a</sup>             |                                    |                    |                    |                                   |                                          |                               |
|----------------------|-----------|--------------------------------------|------------------------------------|--------------------|--------------------|-----------------------------------|------------------------------------------|-------------------------------|
|                      |           | Gastrointestinal disorders (n=20858) | Inflammatory bowel disease (n=666) | Polyps (n=6910)    | Adenomas (n=4254)  | Irritable bowel syndrome (n=2232) | Gastroesophageal reflux disease (n=9942) | Peptic ulcer disease (n=1713) |
|                      | Quarter 2 | 1.03 (0.99, 1.07)                    | 1.09 (0.87, 1.36)                  | 1.01 (0.95, 1.08)  | 0.92 (0.84, 1.00)* | 1.08 (0.96, 1.22)                 | 1.06 (1.00, 1.12)*                       | 0.96 (0.84, 1.10)             |
|                      | Quarter 3 | 1.11 (1.07, 1.15)*                   | 1.16 (0.92, 1.46)                  | 1.08 (1.01, 1.15)* | 1.02 (0.93, 1.11)  | 1.14 (1.01, 1.29)*                | 1.15 (1.09, 1.22)*                       | 1.13 (0.98, 1.30)             |
|                      | Quarter 4 | 1.14 (1.09, 1.18)*                   | 1.33 (1.06, 1.67)*                 | 1.05 (0.98, 1.13)  | 0.98 (0.90, 1.08)  | 1.22 (1.08, 1.38)*                | 1.21 (1.14, 1.29)*                       | 1.18 (1.03, 1.36)*            |
| LCD                  |           |                                      |                                    |                    |                    |                                   |                                          |                               |
| Model 1 <sup>b</sup> | Quarter 1 | 1 (Ref)                              | 1 (Ref)                            | 1 (Ref)            | 1 (Ref)            | 1 (Ref)                           | 1 (Ref)                                  | 1 (Ref)                       |
|                      | Quarter 2 | 0.98 (0.94, 1.02)                    | 0.96 (0.76, 1.20)                  | 1.03 (0.96, 1.11)  | 1.03 (0.94, 1.13)  | 0.89 (0.79, 1.01)                 | 0.95 (0.90, 1.01)                        | 0.96 (0.84, 1.10)             |
|                      | Quarter 3 | 0.99 (0.95, 1.03)                    | 1.09 (0.89, 1.35)                  | 1.07 (1.00, 1.14)  | 1.12 (1.03, 1.22)* | 0.88 (0.78, 0.98)*                | 0.93 (0.89, 0.99)*                       | 0.91 (0.80, 1.04)             |
|                      | Quarter 4 | 0.99 (0.96, 1.03)                    | 1.00 (0.80, 1.25)                  | 1.13 (1.06, 1.21)* | 1.22 (1.12, 1.33)* | 0.90 (0.80, 1.01)                 | 0.91 (0.86, 0.97)*                       | 1.04 (0.91, 1.20)             |
| Model 3 <sup>d</sup> | Quarter 1 | 1 (Ref)                              | 1 (Ref)                            | 1 (Ref)            | 1 (Ref)            | 1 (Ref)                           | 1 (Ref)                                  | 1 (Ref)                       |
|                      | Quarter 2 | 0.98 (0.94, 1.02)                    | 0.96 (0.77, 1.20)                  | 1.01 (0.94, 1.08)  | 1.01 (0.92, 1.10)  | 0.91 (0.81, 1.03)                 | 0.96 (0.90, 1.01)                        | 0.98 (0.85, 1.12)             |
|                      | Quarter 3 | 0.97 (0.94, 1.01)                    | 1.09 (0.88, 1.34)                  | 1.02 (0.96, 1.09)  | 1.07 (0.98, 1.16)  | 0.90 (0.80, 1.01)                 | 0.93 (0.88, 0.98)*                       | 0.91 (0.80, 1.04)             |
|                      | Quarter 4 | 0.95 (0.91, 0.99)*                   | 0.97 (0.78, 1.22)                  | 1.04 (0.97, 1.12)  | 1.12 (1.02, 1.22)* | 0.92 (0.82, 1.04)                 | 0.89 (0.84, 0.94)*                       | 0.99 (0.87, 1.14)             |
| Animal-rich LCD      |           |                                      |                                    |                    |                    |                                   |                                          |                               |
| Model 1 <sup>b</sup> | Quarter 1 | 1 (Ref)                              | 1 (Ref)                            | 1 (Ref)            | 1 (Ref)            | 1 (Ref)                           | 1 (Ref)                                  | 1 (Ref)                       |
|                      | Quarter 2 | 0.98 (0.95, 1.02)                    | 0.86 (0.70, 1.06)                  | 1.03 (0.96, 1.10)  | 1.05 (0.96, 1.14)  | 0.91 (0.81, 1.01)                 | 0.97 (0.92, 1.02)                        | 0.92 (0.80, 1.04)             |
|                      | Quarter 3 | 0.99 (0.95, 1.03)                    | 0.89 (0.72, 1.12)                  | 1.09 (1.02, 1.17)* | 1.16 (1.06, 1.27)* | 0.81 (0.72, 0.92)*                | 0.93 (0.88, 0.98)*                       | 0.89 (0.77, 1.02)             |
|                      | Quarter 4 | 1.01 (0.97, 1.04)                    | 0.93 (0.76, 1.14)                  | 1.11 (1.04, 1.18)* | 1.20 (1.10, 1.30)* | 0.89 (0.79, 0.99)*                | 0.95 (0.90, 1.01)                        | 1.01 (0.89, 1.15)             |
| Model 3 <sup>d</sup> | Quarter 1 | 1 (Ref)                              | 1 (Ref)                            | 1 (Ref)            | 1 (Ref)            | 1 (Ref)                           | 1 (Ref)                                  | 1 (Ref)                       |
|                      | Quarter 2 | 0.97 (0.93, 1.01)                    | 0.90 (0.64, 1.25)                  | 1.00 (0.93, 1.06)  | 1.02 (0.93, 1.11)  | 0.92 (0.83, 1.03)                 | 0.96 (0.91, 1.01)                        | 0.92 (0.81, 1.05)             |
|                      | Quarter 3 | 0.97 (0.93, 1.01)                    | 0.63 (0.42, 0.95)*                 | 1.03 (0.96, 1.11)  | 1.10 (1.00, 1.20)* | 0.83 (0.73, 0.94)*                | 0.92 (0.87, 0.97)*                       | 0.89 (0.77, 1.02)             |
|                      | Quarter 4 | 0.95 (0.92, 0.99)*                   | 0.63 (0.43, 0.91)*                 | 1.00 (0.94, 1.07)  | 1.08 (0.99, 1.17)  | 0.92 (0.82, 1.03)                 | 0.92 (0.87, 0.97)*                       | 0.97 (0.85, 1.10)             |
| Plant-rich LCD       |           |                                      |                                    |                    |                    |                                   |                                          |                               |
| Model 1 <sup>b</sup> | Quarter 1 | 1 (Ref)                              | 1 (Ref)                            | 1 (Ref)            | 1 (Ref)            | 1 (Ref)                           | 1 (Ref)                                  | 1 (Ref)                       |
|                      | Quarter 2 | 0.94 (0.91, 0.98)*                   | 0.92 (0.62, 1.35)                  | 0.95 (0.89, 1.01)  | 0.99 (0.91, 1.08)  | 0.91 (0.81, 1.03)                 | 0.92 (0.87, 0.97)*                       | 0.90 (0.79, 1.03)             |

| Dietary patterns     |           | HR (95% CI) <sup>a</sup>             |                                    |                    |                    |                                   |                                          |                               |
|----------------------|-----------|--------------------------------------|------------------------------------|--------------------|--------------------|-----------------------------------|------------------------------------------|-------------------------------|
|                      |           | Gastrointestinal disorders (n=20858) | Inflammatory bowel disease (n=666) | Polyps (n=6910)    | Adenomas (n=4254)  | Irritable bowel syndrome (n=2232) | Gastroesophageal reflux disease (n=9942) | Peptic ulcer disease (n=1713) |
|                      | Quarter 3 | 0.94 (0.90, 0.97)*                   | 0.89 (0.61, 1.28)                  | 0.95 (0.89, 1.01)  | 1.00 (0.92, 1.09)  | 0.92 (0.82, 1.03)                 | 0.91 (0.86, 0.96)*                       | 0.96 (0.84, 1.09)             |
|                      | Quarter 4 | 0.92 (0.89, 0.96)*                   | 1.16 (0.81, 1.65)                  | 1.00 (0.93, 1.07)  | 1.05 (0.97, 1.14)  | 0.90 (0.80, 1.01)                 | 0.87 (0.82, 0.91)*                       | 0.93 (0.82, 1.07)             |
| Model 3 <sup>d</sup> | Quarter 1 | 1 (Ref)                              | 1 (Ref)                            | 1 (Ref)            | 1 (Ref)            | 1 (Ref)                           | 1 (Ref)                                  | 1 (Ref)                       |
|                      | Quarter 2 | 0.95 (0.91, 0.99)*                   | 1.05 (0.84, 1.30)                  | 0.95 (0.89, 1.01)  | 0.99 (0.91, 1.08)  | 0.92 (0.82, 1.04)                 | 0.93 (0.88, 0.98)*                       | 0.92 (0.80, 1.06)             |
|                      | Quarter 3 | 0.95 (0.91, 0.98)*                   | 0.96 (0.78, 1.19)                  | 0.95 (0.89, 1.01)  | 1.00 (0.92, 1.09)  | 0.93 (0.83, 1.04)                 | 0.92 (0.87, 0.97)*                       | 0.97 (0.86, 1.11)             |
|                      | Quarter 4 | 0.93 (0.90, 0.97)*                   | 1.03 (0.84, 1.28)                  | 1.00 (0.93, 1.06)  | 1.05 (0.96, 1.14)  | 0.90 (0.80, 1.01)                 | 0.89 (0.84, 0.94)*                       | 0.94 (0.82, 1.07)             |
| GDQS                 |           |                                      |                                    |                    |                    |                                   |                                          |                               |
| Model 1 <sup>b</sup> | Quarter 1 | 1 (Ref)                              | 1 (Ref)                            | 1 (Ref)            | 1 (Ref)            | 1 (Ref)                           | 1 (Ref)                                  | 1 (Ref)                       |
|                      | Quarter 2 | 0.93 (0.89, 0.96)*                   | 1.11 (0.90, 1.36)                  | 0.89 (0.83, 0.95)* | 0.97 (0.89, 1.06)  | 0.91 (0.81, 1.03)                 | 0.91 (0.86, 0.97)*                       | 0.87 (0.76, 0.99)*            |
|                      | Quarter 3 | 0.89 (0.86, 0.93)*                   | 0.84 (0.67, 1.04)                  | 0.87 (0.81, 0.93)* | 0.95 (0.87, 1.03)  | 0.90 (0.80, 1.01)                 | 0.90 (0.85, 0.95)*                       | 0.77 (0.67, 0.88)*            |
|                      | Quarter 4 | 0.83 (0.80, 0.87)*                   | 0.80 (0.64, 1.00)*                 | 0.86 (0.80, 0.92)* | 0.91 (0.84, 0.99)* | 0.84 (0.75, 0.95)*                | 0.80 (0.76, 0.85)*                       | 0.81 (0.71, 0.93)*            |
| Model 3 <sup>d</sup> | Quarter 1 | 1 (Ref)                              | 1 (Ref)                            | 1 (Ref)            | 1 (Ref)            | 1 (Ref)                           | 1 (Ref)                                  | 1 (Ref)                       |
|                      | Quarter 2 | 0.95 (0.92, 0.99)*                   | 1.14 (0.93, 1.40)                  | 0.92 (0.86, 0.98)* | 1.00 (0.92, 1.09)  | 0.93 (0.82, 1.04)                 | 0.94 (0.89, 0.99)*                       | 0.90 (0.79, 1.03)             |
|                      | Quarter 3 | 0.93 (0.90, 0.97)*                   | 0.87 (0.70, 1.08)                  | 0.91 (0.85, 0.97)* | 1.00 (0.91, 1.08)  | 0.92 (0.81, 1.03)                 | 0.95 (0.89, 1.00)*                       | 0.81 (0.71, 0.93)*            |
|                      | Quarter 4 | 0.89 (0.85, 0.92)*                   | 0.83 (0.66, 1.04)                  | 0.92 (0.86, 0.98)* | 0.98 (0.89, 1.06)  | 0.86 (0.76, 0.97)*                | 0.86 (0.81, 0.91)*                       | 0.87 (0.76, 0.99)*            |
| GDQS+                |           |                                      |                                    |                    |                    |                                   |                                          |                               |
| Model 1 <sup>b</sup> | Quarter 1 | 1 (Ref)                              | 1 (Ref)                            | 1 (Ref)            | 1 (Ref)            | 1 (Ref)                           | 1 (Ref)                                  | 1 (Ref)                       |
|                      | Quarter 2 | 0.93 (0.89, 0.96)*                   | 0.91 (0.74, 1.12)                  | 0.94 (0.88, 1.00)  | 0.98 (0.91, 1.07)  | 0.86 (0.77, 0.97)*                | 0.92 (0.87, 0.97)*                       | 0.84 (0.74, 0.96)*            |
|                      | Quarter 3 | 0.87 (0.84, 0.91)*                   | 0.81 (0.65, 1.00)*                 | 0.89 (0.83, 0.95)* | 0.90 (0.82, 0.98)* | 0.89 (0.80, 1.00)                 | 0.85 (0.81, 0.90)*                       | 0.72 (0.63, 0.82)*            |
|                      | Quarter 4 | 0.86 (0.83, 0.89)*                   | 0.78 (0.63, 0.97)*                 | 0.90 (0.84, 0.96)* | 0.94 (0.87, 1.03)  | 0.85 (0.76, 0.96)*                | 0.82 (0.77, 0.87)*                       | 0.83 (0.73, 0.94)*            |
| Model 3 <sup>d</sup> | Quarter 1 | 1 (Ref)                              | 1 (Ref)                            | 1 (Ref)            | 1 (Ref)            | 1 (Ref)                           | 1 (Ref)                                  | 1 (Ref)                       |
|                      | Quarter 2 | 0.95 (0.92, 0.99)*                   | 0.93 (0.75, 1.14)                  | 0.97 (0.91, 1.04)  | 1.02 (0.94, 1.11)  | 0.87 (0.78, 0.98)*                | 0.94 (0.89, 1.00)*                       | 0.88 (0.78, 1.01)             |
|                      | Quarter 3 | 0.91 (0.88, 0.95)*                   | 0.83 (0.67, 1.03)                  | 0.93 (0.87, 1.00)* | 0.95 (0.87, 1.04)  | 0.91 (0.81, 1.02)                 | 0.89 (0.85, 0.95)*                       | 0.77 (0.67, 0.88)*            |
|                      | Quarter 4 | 0.90 (0.87, 0.94)*                   | 0.79 (0.64, 0.99)*                 | 0.95 (0.88, 1.01)  | 1.00 (0.92, 1.10)  | 0.86 (0.76, 0.97)*                | 0.87 (0.82, 0.92)*                       | 0.89 (0.78, 1.02)             |
| GDQS-                |           |                                      |                                    |                    |                    |                                   |                                          |                               |
| Model 1 <sup>b</sup> | Quarter 1 | 1 (Ref)                              | 1 (Ref)                            | 1 (Ref)            | 1 (Ref)            | 1 (Ref)                           | 1 (Ref)                                  | 1 (Ref)                       |

| Dietary patterns     |           | HR (95% CI) <sup>a</sup>             |                                    |                    |                   |                                   |                                          |                               |
|----------------------|-----------|--------------------------------------|------------------------------------|--------------------|-------------------|-----------------------------------|------------------------------------------|-------------------------------|
|                      |           | Gastrointestinal disorders (n=20858) | Inflammatory bowel disease (n=666) | Polyps (n=6910)    | Adenomas (n=4254) | Irritable bowel syndrome (n=2232) | Gastroesophageal reflux disease (n=9942) | Peptic ulcer disease (n=1713) |
|                      | Quarter 2 | 0.96 (0.92, 1.00)                    | 1.04 (0.82, 1.31)                  | 0.98 (0.92, 1.06)  | 0.96 (0.88, 1.06) | 0.93 (0.82, 1.06)                 | 0.98 (0.92, 1.04)                        | 0.90 (0.78, 1.04)             |
|                      | Quarter 3 | 0.97 (0.93, 1.00)                    | 0.91 (0.75, 1.11)                  | 0.96 (0.91, 1.02)  | 0.99 (0.91, 1.07) | 0.91 (0.82, 1.01)                 | 1.00 (0.95, 1.05)                        | 0.92 (0.82, 1.05)             |
|                      | Quarter 4 | 0.95 (0.92, 0.99)*                   | 0.98 (0.80, 1.21)                  | 0.94 (0.88, 1.01)  | 0.98 (0.91, 1.07) | 0.91 (0.81, 1.02)                 | 0.95 (0.90, 1.00)                        | 1.02 (0.90, 1.16)             |
| Model 3 <sup>d</sup> | Quarter 1 | 1 (Ref)                              | 1 (Ref)                            | 1 (Ref)            | 1 (Ref)           | 1 (Ref)                           | 1 (Ref)                                  | 1 (Ref)                       |
|                      | Quarter 2 | 0.97 (0.93, 1.01)                    | 1.05 (0.83, 1.32)                  | 0.99 (0.92, 1.07)  | 0.97 (0.88, 1.07) | 0.93 (0.82, 1.06)                 | 0.98 (0.93, 1.05)                        | 0.90 (0.77, 1.04)             |
|                      | Quarter 3 | 0.98 (0.94, 1.01)                    | 0.93 (0.76, 1.13)                  | 0.98 (0.92, 1.04)  | 1.00 (0.92, 1.08) | 0.92 (0.82, 1.02)                 | 1.01 (0.96, 1.06)                        | 0.92 (0.81, 1.04)             |
|                      | Quarter 4 | 0.96 (0.92, 1.00)*                   | 1.00 (0.81, 1.25)                  | 0.96 (0.90, 1.03)  | 0.99 (0.91, 1.08) | 0.92 (0.81, 1.03)                 | 0.96 (0.91, 1.02)                        | 1.00 (0.88, 1.14)             |
| DII                  |           |                                      |                                    |                    |                   |                                   |                                          |                               |
| Model 1 <sup>b</sup> | Quarter 1 | 1 (Ref)                              | 1 (Ref)                            | 1 (Ref)            | 1 (Ref)           | 1 (Ref)                           | 1 (Ref)                                  | 1 (Ref)                       |
|                      | Quarter 2 | 0.99 (0.95, 1.03)                    | 0.87 (0.70, 1.09)                  | 0.97 (0.90, 1.03)  | 0.94 (0.86, 1.02) | 1.03 (0.92, 1.16)                 | 1.01 (0.95, 1.07)                        | 0.99 (0.87, 1.13)             |
|                      | Quarter 3 | 1.04 (1.00, 1.08)                    | 1.01 (0.82, 1.25)                  | 1.04 (0.97, 1.11)  | 0.97 (0.89, 1.06) | 0.97 (0.86, 1.10)                 | 1.09 (1.03, 1.15)*                       | 1.01 (0.88, 1.15)             |
|                      | Quarter 4 | 1.11 (1.07, 1.16)*                   | 1.02 (0.82, 1.26)                  | 1.05 (0.99, 1.13)  | 1.02 (0.94, 1.11) | 1.11 (0.99, 1.25)                 | 1.19 (1.13, 1.26)*                       | 1.15 (1.00, 1.31)             |
| Model 2 <sup>c</sup> | Quarter 1 | 1 (Ref)                              | 1 (Ref)                            | 1 (Ref)            | 1 (Ref)           | 1 (Ref)                           | 1 (Ref)                                  | 1 (Ref)                       |
|                      | Quarter 2 | 1.01 (0.97, 1.05)                    | 0.91 (0.72, 1.13)                  | 1.00 (0.93, 1.07)  | 0.95 (0.88, 1.04) | 1.04 (0.92, 1.17)                 | 1.02 (0.96, 1.08)                        | 1.00 (0.87, 1.15)             |
|                      | Quarter 3 | 1.05 (1.01, 1.09)*                   | 1.07 (0.85, 1.34)                  | 1.07 (1.00, 1.15)* | 0.98 (0.89, 1.07) | 0.98 (0.86, 1.12)                 | 1.09 (1.03, 1.16)*                       | 1.00 (0.86, 1.15)             |
|                      | Quarter 4 | 1.12 (1.07, 1.17)*                   | 1.09 (0.85, 1.40)                  | 1.09 (1.01, 1.18)* | 1.01 (0.91, 1.11) | 1.13 (0.98, 1.29)                 | 1.19 (1.11, 1.27)*                       | 1.09 (0.93, 1.27)             |

78 Abbreviations: AHEI-2010, Alternate Healthy Eating Index-2010; AMED, Alternate Mediterranean Diet; CI, confidence interval; DASH, Dietary Approaches to Stop Hypertension; DII, dietary

79 inflammatory index; GDQS, Global Diet Quality Score; GDQS-, negative submetric of Global Diet Quality Score; GDQS+, positive submetric of Global Diet Quality Score; hPDI, healthful plant-based diet index; HR, hazard ratio; LCD, low carbohydrate diet; PDI, plant-based diet index; uPDI, unhealthful plant-based diet index.

81 <sup>a</sup>HRs (95% CI) are comparing the highest with the lowest quarter. *P* value <0.05 was noted with \*\*.

82 <sup>b</sup>Model 1 was adjusted for age and sex.

83 <sup>c</sup>Model 2 was adjusted for age, sex, BMI, race, cardiovascular disease, diabetes, smoking status, physical activity, multivitamin use, regular aspirin use, regular NSAID use and total energy intake.

84 <sup>d</sup>Model 3 was adjusted for age, sex, BMI, race, cardiovascular disease, diabetes, smoking status, physical activity, multivitamin use, regular aspirin use, regular NSAID use, total energy intake and alcohol drinking status [none drinking, moderate drinking (<2 drinks/day for men, and <1 drink/day for women), or heavy drinking (≥2 drinks/day for men, and ≥1 drink/day for women)].

86 **Supplementary Table 3. Associations between dietary patterns and gastrointestinal disorders in sensitivity analyses**

| Dietary patterns                                                                           | Model                | HR (95% CI) <sup>a</sup>             |                                    |                     |                     |                                   |                                          |                               |
|--------------------------------------------------------------------------------------------|----------------------|--------------------------------------|------------------------------------|---------------------|---------------------|-----------------------------------|------------------------------------------|-------------------------------|
|                                                                                            |                      | Gastrointestinal disorders (n=20858) | Inflammatory bowel disease (n=666) | Polyps (n=6910)     | Adenoma (n=4254)    | Irritable bowel syndrome (n=2232) | Gastroesophageal reflux disease (n=9942) | Peptic ulcer disease (n=1713) |
| Removal of alcohol component from dietary patterns                                         |                      |                                      |                                    |                     |                     |                                   |                                          |                               |
| AHEI-2010                                                                                  | Model 1 <sup>b</sup> | 0.79 (0.76, 0.82) *                  | 0.74 (0.59, 0.93) *                | 0.79 (0.73, 0.84) * | 0.83 (0.76, 0.91) * | 0.82 (0.73, 0.92) *               | 0.78 (0.74, 0.83) *                      | 0.73 (0.64, 0.84) *           |
|                                                                                            | Model 2 <sup>c</sup> | 0.86 (0.83, 0.90) *                  | 0.79 (0.63, 0.99) *                | 0.88 (0.82, 0.95) * | 0.94 (0.86, 1.02)   | 0.83 (0.73, 0.93) *               | 0.85 (0.80, 0.90) *                      | 0.80 (0.69, 0.92) *           |
| AMED                                                                                       | Model 1 <sup>b</sup> | 0.80 (0.76, 0.83) *                  | 0.70 (0.55, 0.90) *                | 0.81 (0.76, 0.88) * | 0.86 (0.78, 0.94) * | 0.88 (0.78, 1.00)                 | 0.76 (0.71, 0.81) *                      | 0.74 (0.64, 0.85) *           |
|                                                                                            | Model 2 <sup>c</sup> | 0.86 (0.83, 0.90) *                  | 0.74 (0.57, 0.94) *                | 0.90 (0.83, 0.97) * | 0.96 (0.87, 1.05)   | 0.90 (0.79, 1.03)                 | 0.83 (0.78, 0.89) *                      | 0.81 (0.70, 0.94) *           |
| DII                                                                                        | Model 1 <sup>b</sup> | 1.10 (1.06, 1.15) *                  | 1.02 (0.82, 1.26)                  | 1.07 (1.00, 1.15) * | 1.04 (0.96, 1.14)   | 1.08 (0.96, 1.21)                 | 1.17 (1.11, 1.24) *                      | 1.12 (0.98, 1.28)             |
|                                                                                            | Model 3 <sup>d</sup> | 1.10 (1.05, 1.15) *                  | 1.07 (0.84, 1.38)                  | 1.10 (1.01, 1.18) * | 1.02 (0.92, 1.12)   | 1.10 (0.96, 1.25)                 | 1.17 (1.09, 1.24) *                      | 1.06 (0.91, 1.24)             |
| Removal of participants with incident gastrointestinal disorders in the previous two years |                      |                                      |                                    |                     |                     |                                   |                                          |                               |
| AHEI-2010                                                                                  | Model 1 <sup>b</sup> | 0.78 (0.75, 0.81) *                  | 0.71 (0.56, 0.90) *                | 0.76 (0.71, 0.82) * | 0.80 (0.73, 0.88) * | 0.85 (0.74, 0.97) *               | 0.78 (0.74, 0.83) *                      | 0.70 (0.60, 0.81) *           |
|                                                                                            | Model 2 <sup>c</sup> | 0.91 (0.87, 0.95) *                  | 0.77 (0.61, 0.99) *                | 0.92 (0.85, 0.99) * | 0.99 (0.90, 1.09)   | 0.87 (0.76, 0.99) *               | 0.93 (0.87, 0.99) *                      | 0.85 (0.73, 0.99) *           |
| AMED                                                                                       | Model 1 <sup>b</sup> | 0.77 (0.74, 0.80) *                  | 0.71 (0.55, 0.92) *                | 0.78 (0.72, 0.84) * | 0.82 (0.75, 0.90) * | 0.87 (0.75, 1.00) *               | 0.74 (0.70, 0.79) *                      | 0.70 (0.60, 0.81) *           |
|                                                                                            | Model 2 <sup>c</sup> | 0.88 (0.84, 0.92) *                  | 0.76 (0.59, 0.99) *                | 0.90 (0.83, 0.97) * | 0.96 (0.87, 1.06)   | 0.89 (0.77, 1.02)                 | 0.86 (0.81, 0.92) *                      | 0.83 (0.71, 0.97) *           |
| DASH                                                                                       | Model 1 <sup>b</sup> | 0.77 (0.74, 0.81) *                  | 0.75 (0.59, 0.96) *                | 0.75 (0.69, 0.80) * | 0.75 (0.68, 0.82) * | 0.85 (0.74, 0.97) *               | 0.78 (0.73, 0.83) *                      | 0.66 (0.56, 0.77) *           |
|                                                                                            | Model 3 <sup>d</sup> | 0.93 (0.89, 0.97) *                  | 0.84 (0.65, 1.07)                  | 0.95 (0.88, 1.02)   | 0.99 (0.90, 1.09)   | 0.85 (0.74, 0.98) *               | 0.95 (0.89, 1.01)                        | 0.85 (0.73, 0.99) *           |
| PDI                                                                                        | Model 1 <sup>b</sup> | 0.86 (0.82, 0.89) *                  | 0.80 (0.63, 1.01)                  | 0.83 (0.77, 0.89) * | 0.77 (0.70, 0.85) * | 0.96 (0.85, 1.10)                 | 0.88 (0.83, 0.93) *                      | 0.75 (0.65, 0.87) *           |
|                                                                                            | Model 3 <sup>d</sup> | 0.98 (0.94, 1.02)                    | 0.85 (0.67, 1.08)                  | 0.98 (0.91, 1.06)   | 0.95 (0.87, 1.05)   | 0.95 (0.83, 1.08)                 | 1.00 (0.94, 1.06)                        | 0.91 (0.78, 1.05)             |
| hPDI                                                                                       | Model 1 <sup>b</sup> | 0.86 (0.82, 0.90) *                  | 0.80 (0.63, 1.02)                  | 0.85 (0.79, 0.91) * | 0.87 (0.80, 0.96) * | 0.89 (0.78, 1.02)                 | 0.87 (0.82, 0.93) *                      | 0.91 (0.78, 1.05)             |
|                                                                                            | Model 3 <sup>d</sup> | 0.92 (0.88, 0.96) *                  | 0.81 (0.64, 1.04)                  | 0.92 (0.86, 1.00) * | 0.96 (0.87, 1.06)   | 0.88 (0.76, 1.01)                 | 0.94 (0.89, 1.01)                        | 0.95 (0.81, 1.11)             |
| uPDI                                                                                       | Model 1 <sup>b</sup> | 1.15 (1.11, 1.20) *                  | 1.24 (0.99, 1.54)                  | 1.02 (0.96, 1.09)   | 0.97 (0.89, 1.05)   | 1.28 (1.13, 1.45) *               | 1.28 (1.21, 1.36) *                      | 1.18 (1.03, 1.36) *           |
|                                                                                            | Model 3 <sup>d</sup> | 1.07 (1.02, 1.11) *                  | 1.20 (0.96, 1.50)                  | 0.96 (0.90, 1.03)   | 0.89 (0.82, 0.98) * | 1.24 (1.10, 1.41) *               | 1.16 (1.09, 1.23) *                      | 1.04 (0.90, 1.19)             |
| LCD                                                                                        | Model 1 <sup>b</sup> | 1.01 (0.97, 1.06)                    | 0.99 (0.78, 1.26)                  | 1.15 (1.07, 1.23) * | 1.24 (1.13, 1.36) * | 0.92 (0.81, 1.05)                 | 0.92 (0.87, 0.98) *                      | 1.09 (0.94, 1.26)             |
|                                                                                            | Model 3 <sup>d</sup> | 0.96 (0.92, 1.00)                    | 0.96 (0.76, 1.23)                  | 1.05 (0.98, 1.13)   | 1.13 (1.03, 1.24) * | 0.95 (0.83, 1.08)                 | 0.89 (0.83, 0.94) *                      | 1.03 (0.89, 1.19)             |
| Animal-rich LCD                                                                            | Model 1 <sup>b</sup> | 1.02 (0.98, 1.06)                    | 0.90 (0.73, 1.12)                  | 1.11 (1.04, 1.19) * | 1.22 (1.12, 1.33) * | 0.90 (0.80, 1.02)                 | 0.96 (0.91, 1.02)                        | 1.04 (0.91, 1.20)             |
|                                                                                            | Model 3 <sup>d</sup> | 0.97 (0.93, 1.01)                    | 0.88 (0.70, 1.10)                  | 1.02 (0.95, 1.09)   | 1.11 (1.01, 1.21) * | 0.93 (0.82, 1.06)                 | 0.93 (0.88, 0.98) *                      | 1.00 (0.87, 1.15)             |



| Dietary patterns                                              | Model                | HR (95% CI) <sup>a</sup>             |                                    |                     |                     |                                   |                                          |                               |
|---------------------------------------------------------------|----------------------|--------------------------------------|------------------------------------|---------------------|---------------------|-----------------------------------|------------------------------------------|-------------------------------|
|                                                               |                      | Gastrointestinal disorders (n=20858) | Inflammatory bowel disease (n=666) | Polyps (n=6910)     | Adenoma (n=4254)    | Irritable bowel syndrome (n=2232) | Gastroesophageal reflux disease (n=9942) | Peptic ulcer disease (n=1713) |
| Plant-rich LCD                                                | Model 1 <sup>b</sup> | 0.92 (0.88, 0.96) *                  | 1.02 (0.82, 1.28)                  | 0.99 (0.93, 1.07)   | 1.04 (0.95, 1.14)   | 0.88 (0.78, 1.00)                 | 0.87 (0.82, 0.92) *                      | 0.94 (0.82, 1.08)             |
|                                                               | Model 3 <sup>d</sup> | 0.92 (0.88, 0.95) *                  | 1.02 (0.82, 1.28)                  | 0.98 (0.92, 1.05)   | 1.02 (0.94, 1.11)   | 0.89 (0.78, 1.01)                 | 0.88 (0.83, 0.93) *                      | 0.93 (0.80, 1.07)             |
| GDQS                                                          | Model 1 <sup>b</sup> | 0.83 (0.80, 0.87) *                  | 0.82 (0.65, 1.04)                  | 0.86 (0.80, 0.92) * | 0.92 (0.84, 1.01)   | 0.85 (0.75, 0.97) *               | 0.79 (0.75, 0.84) *                      | 0.81 (0.70, 0.93) *           |
|                                                               | Model 3 <sup>d</sup> | 0.95 (0.91, 0.99) *                  | 0.87 (0.68, 1.10)                  | 0.99 (0.92, 1.06)   | 1.09 (1.00, 1.19)   | 0.87 (0.76, 0.99) *               | 0.93 (0.87, 0.98) *                      | 0.97 (0.84, 1.12)             |
| GDQS+                                                         | Model 1 <sup>b</sup> | 0.85 (0.82, 0.89) *                  | 0.77 (0.62, 0.97) *                | 0.89 (0.83, 0.95) * | 0.95 (0.87, 1.03)   | 0.84 (0.74, 0.96) *               | 0.82 (0.77, 0.87) *                      | 0.84 (0.73, 0.97) *           |
|                                                               | Model 3 <sup>d</sup> | 0.96 (0.92, 1.00)                    | 0.80 (0.64, 1.02)                  | 1.01 (0.94, 1.08)   | 1.11 (1.02, 1.22) * | 0.85 (0.75, 0.97) *               | 0.94 (0.89, 1.00) *                      | 1.02 (0.88, 1.17)             |
| GDQS-                                                         | Model 1 <sup>b</sup> | 0.95 (0.91, 0.99) *                  | 1.01 (0.80, 1.27)                  | 0.96 (0.90, 1.03)   | 0.98 (0.90, 1.07)   | 0.91 (0.80, 1.03)                 | 0.95 (0.89, 1.00)                        | 0.98 (0.85, 1.12)             |
|                                                               | Model 3 <sup>d</sup> | 0.97 (0.93, 1.01)                    | 1.01 (0.80, 1.28)                  | 0.98 (0.91, 1.05)   | 1.00 (0.91, 1.09)   | 0.91 (0.80, 1.04)                 | 0.97 (0.91, 1.03)                        | 0.96 (0.83, 1.11)             |
| DII                                                           | Model 1 <sup>b</sup> | 1.12 (1.07, 1.16) *                  | 1.03 (0.82, 1.29)                  | 1.07 (0.99, 1.14)   | 1.02 (0.94, 1.12)   | 1.14 (1.01, 1.30) *               | 1.18 (1.11, 1.25) *                      | 1.18 (1.02, 1.36) *           |
|                                                               | Model 2 <sup>c</sup> | 1.04 (1.00, 1.10)                    | 1.03 (0.79, 1.35)                  | 1.03 (0.94, 1.11)   | 0.92 (0.83, 1.02)   | 1.16 (1.00, 1.35) *               | 1.08 (1.01, 1.16) *                      | 1.00 (0.85, 1.18)             |
| Removal of body mass index from the covariate list            |                      |                                      |                                    |                     |                     |                                   |                                          |                               |
| AHEI-2010                                                     | Model 2 <sup>c</sup> | 0.88 (0.85, 0.92) *                  | 0.75 (0.60, 0.94) *                | 0.88 (0.83, 0.95) * | 0.95 (0.86, 1.03)   | 0.86 (0.76, 0.97) *               | 0.88 (0.83, 0.93) *                      | 0.86 (0.74, 0.98) *           |
| AMED                                                          | Model 2 <sup>c</sup> | 0.85 (0.82, 0.89) *                  | 0.73 (0.57, 0.93) *                | 0.88 (0.81, 0.94) * | 0.94 (0.85, 1.03)   | 0.86 (0.76, 0.98) *               | 0.83 (0.78, 0.88) *                      | 0.80 (0.70, 0.93) *           |
| DASH                                                          | Model 3 <sup>d</sup> | 0.89 (0.85, 0.93) *                  | 0.78 (0.62, 0.98) *                | 0.91 (0.85, 0.98) * | 0.95 (0.87, 1.04)   | 0.81 (0.71, 0.92) *               | 0.89 (0.84, 0.94) *                      | 0.83 (0.72, 0.96) *           |
| PDI                                                           | Model 3 <sup>d</sup> | 0.95 (0.91, 0.99) *                  | 0.81 (0.64, 1.01)                  | 0.96 (0.89, 1.03)   | 0.93 (0.85, 1.02)   | 0.94 (0.83, 1.06)                 | 0.95 (0.89, 1.00)                        | 0.87 (0.76, 1.00) *           |
| hPDI                                                          | Model 3 <sup>d</sup> | 0.91 (0.87, 0.95) *                  | 0.78 (0.62, 0.99) *                | 0.90 (0.84, 0.97) * | 0.94 (0.86, 1.03)   | 0.88 (0.78, 1.00)                 | 0.93 (0.88, 0.99) *                      | 0.98 (0.85, 1.13)             |
| uPDI                                                          | Model 3 <sup>d</sup> | 1.08 (1.04, 1.12) *                  | 1.20 (0.97, 1.48)                  | 0.97 (0.91, 1.03)   | 0.91 (0.83, 0.98) * | 1.26 (1.12, 1.41) *               | 1.19 (1.13, 1.26) *                      | 1.05 (0.92, 1.20)             |
| LCD                                                           | Model 3 <sup>d</sup> | 0.97 (0.93, 1.00)                    | 0.97 (0.93, 1.00)                  | 1.06 (0.99, 1.14)   | 1.13 (1.04, 1.24) * | 0.92 (0.82, 1.04)                 | 0.91 (0.85, 0.96) *                      | 1.01 (0.88, 1.16)             |
| Animal-rich LCD                                               | Model 3 <sup>d</sup> | 0.99 (0.95, 1.03)                    | 0.93 (0.75, 1.14)                  | 1.04 (0.98, 1.11)   | 1.12 (1.03, 1.22) * | 0.91 (0.82, 1.02)                 | 0.96 (0.91, 1.01)                        | 1.01 (0.89, 1.15)             |
| Plant-rich LCD                                                | Model 3 <sup>d</sup> | 0.90 (0.87, 0.94) *                  | 1.02 (0.83, 1.26)                  | 0.96 (0.90, 1.03)   | 1.01 (0.93, 1.10)   | 0.91 (0.81, 1.02)                 | 0.86 (0.81, 0.90) *                      | 0.90 (0.79, 1.03)             |
| GDQS                                                          | Model 3 <sup>d</sup> | 0.93 (0.89, 0.97) *                  | 0.83 (0.66, 1.04)                  | 0.96 (0.90, 1.03)   | 1.05 (0.97, 1.15)   | 0.86 (0.76, 0.96) *               | 0.90 (0.85, 0.96) *                      | 0.95 (0.83, 1.08)             |
| GDQS+                                                         | Model 3 <sup>d</sup> | 0.95 (0.91, 0.99) *                  | 0.79 (0.64, 0.99) *                | 1.00 (0.93, 1.07)   | 1.09 (1.00, 1.19) * | 0.86 (0.76, 0.96) *               | 0.92 (0.87, 0.97) *                      | 0.98 (0.85, 1.11)             |
| GDQS-                                                         | Model 3 <sup>d</sup> | 0.95 (0.92, 0.99) *                  | 1.00 (0.81, 1.24)                  | 0.95 (0.89, 1.02)   | 0.98 (0.90, 1.07)   | 0.92 (0.81, 1.03)                 | 0.95 (0.90, 1.01)                        | 1.00 (0.87, 1.14)             |
| DII                                                           | Model 2 <sup>c</sup> | 1.06 (1.01, 1.10) *                  | 1.09 (0.85, 1.39)                  | 1.03 (0.95, 1.11)   | 0.93 (0.84, 1.02)   | 1.13 (0.99, 1.30)                 | 1.12 (1.05, 1.19) *                      | 0.99 (0.85, 1.15)             |
| Further adjusting for the number of completed dietary surveys |                      |                                      |                                    |                     |                     |                                   |                                          |                               |

| Dietary patterns | Model                | HR (95% CI) <sup>a</sup>             |                                    |                     |                     |                                   |                                          |                               |
|------------------|----------------------|--------------------------------------|------------------------------------|---------------------|---------------------|-----------------------------------|------------------------------------------|-------------------------------|
|                  |                      | Gastrointestinal disorders (n=20858) | Inflammatory bowel disease (n=666) | Polyps (n=6910)     | Adenoma (n=4254)    | Irritable bowel syndrome (n=2232) | Gastroesophageal reflux disease (n=9942) | Peptic ulcer disease (n=1713) |
| AHEI-2010        | Model 4 <sup>e</sup> | 0.87 (0.83, 0.90) *                  | 0.78 (0.62, 0.98) *                | 0.86 (0.80, 0.92) * | 0.90 (0.82, 0.98) * | 0.88 (0.78, 1.00) *               | 0.87 (0.82, 0.92) *                      | 0.83 (0.72, 0.96) *           |
| AMED             | Model 4 <sup>e</sup> | 0.86 (0.82, 0.90) *                  | 0.78 (0.60, 1.01)                  | 0.86 (0.79, 0.93) * | 0.91 (0.82, 1.01)   | 0.89 (0.78, 1.03)                 | 0.85 (0.80, 0.91) *                      | 0.83 (0.71, 0.97) *           |
| DASH             | Model 5 <sup>f</sup> | 0.86 (0.82, 0.90) *                  | 0.82 (0.64, 1.05)                  | 0.86 (0.80, 0.93) * | 0.87 (0.79, 0.96) * | 0.83 (0.73, 0.95) *               | 0.87 (0.82, 0.93) *                      | 0.79 (0.68, 0.93) *           |
| PDI              | Model 5 <sup>f</sup> | 0.96 (0.92, 1.01)                    | 0.88 (0.67, 1.14)                  | 0.94 (0.86, 1.01)   | 0.88 (0.79, 0.97) * | 1.01 (0.88, 1.17)                 | 0.99 (0.93, 1.06)                        | 0.90 (0.77, 1.06)             |
| hPDI             | Model 5 <sup>f</sup> | 0.87 (0.83, 0.91) *                  | 0.73 (0.57, 0.92) *                | 0.88 (0.82, 0.95) * | 0.92 (0.83, 1.01)   | 0.84 (0.74, 0.96) *               | 0.89 (0.83, 0.95) *                      | 0.90 (0.77, 1.04)             |
| uPDI             | Model 5 <sup>f</sup> | 1.11 (1.06, 1.16) *                  | 1.28 (1.00, 1.65)                  | 1.05 (0.97, 1.13)   | 0.97 (0.88, 1.07)   | 1.20 (1.04, 1.37) *               | 1.19 (1.11, 1.27) *                      | 1.09 (0.93, 1.27)             |
| LCD              | Model 5 <sup>f</sup> | 0.96 (0.92, 0.99) *                  | 0.99 (0.79, 1.24)                  | 1.04 (0.97, 1.12)   | 1.12 (1.02, 1.22) * | 0.93 (0.82, 1.05)                 | 0.89 (0.84, 0.95) *                      | 1.01 (0.88, 1.16)             |
| Animal-rich LCD  | Model 5 <sup>f</sup> | 0.96 (0.92, 1.00) *                  | 0.64 (0.44, 0.92) *                | 1.01 (0.94, 1.08)   | 1.08 (0.99, 1.17)   | 0.92 (0.82, 1.03)                 | 0.93 (0.88, 0.98) *                      | 0.98 (0.86, 1.12)             |
| Plant-rich LCD   | Model 5 <sup>f</sup> | 0.94 (0.90, 0.97) *                  | 1.05 (0.85, 1.30)                  | 1.00 (0.93, 1.06)   | 1.05 (0.96, 1.14)   | 0.91 (0.81, 1.02)                 | 0.90 (0.85, 0.95) *                      | 0.95 (0.83, 1.09)             |
| GDQS             | Model 5 <sup>f</sup> | 0.90 (0.86, 0.93) *                  | 0.85 (0.68, 1.07)                  | 0.92 (0.86, 0.98) * | 0.98 (0.90, 1.07)   | 0.88 (0.78, 0.99) *               | 0.87 (0.83, 0.93) *                      | 0.90 (0.78, 1.03)             |
| GDQS+            | Model 5 <sup>f</sup> | 0.92 (0.89, 0.97) *                  | 0.83 (0.65, 1.06)                  | 0.95 (0.88, 1.03)   | 1.02 (0.92, 1.12)   | 0.89 (0.78, 1.01)                 | 0.90 (0.84, 0.95) *                      | 0.96 (0.83, 1.11)             |
| GDQS-            | Model 5 <sup>f</sup> | 0.91 (0.87, 0.95) *                  | 0.92 (0.72, 1.16)                  | 0.94 (0.87, 1.01)   | 0.97 (0.89, 1.07)   | 0.85 (0.75, 0.97) *               | 0.90 (0.85, 0.96) *                      | 0.90 (0.78, 1.04)             |
| DII              | Model 4 <sup>e</sup> | 1.10 (1.05, 1.15) *                  | 1.06 (0.82, 1.36)                  | 1.09 (1.00, 1.17)   | 1.00 (0.91, 1.11)   | 1.11 (0.96, 1.27)                 | 1.17 (1.09, 1.24) *                      | 1.05 (0.90, 1.23)             |

87 Abbreviations: AHEI-2010, Alternate Healthy Eating Index-2010; AMED, Alternate Mediterranean Diet; CI, confidence interval; DASH, Dietary Approaches to Stop Hypertension; DII, dietary  
88 inflammatory index; GDQS, Global Diet Quality Score; GDQS-, negative submetric of Global Diet Quality Score; GDQS+, positive submetric of Global Diet Quality Score; hPDI, healthful plant-based  
89 diet index; HR, hazard ratio; LCD, low carbohydrate diet; PDI, plant-based diet index; uPDI, unhealthful plant-based diet index.  
90 <sup>a</sup>HRs (95% CI) are comparing the highest quarter with the lowest quarter. *P* value <0.05 was noted with '\*'.  
91 <sup>b</sup>Model 1 was adjusted for age and sex.  
92 <sup>c</sup>Model 2 was adjusted for age, sex, BMI, race, cardiovascular disease, diabetes, smoking status, physical activity, multivitamin use, regular aspirin use, regular NSAID use and total energy intake.  
93 <sup>d</sup>Model 3 was adjusted for age, sex, BMI, race, cardiovascular disease, diabetes, smoking status, physical activity, multivitamin use, regular aspirin use, regular NSAID use, total energy intake and  
94 alcohol drinking status [none drinking, moderate drinking (<2 drinks/day for men, and <1 drink/day for women), or heavy drinking (≥2 drinks/day for men, and ≥1 drink/day for women)].  
95 <sup>e</sup>Model 4 was adjusted for number of dietary surveys, age, sex, BMI, race, cardiovascular disease, diabetes, smoking status, physical activity, multivitamin use, regular aspirin use, regular NSAID use  
96 and total energy intake.  
97 <sup>f</sup>Model 5 was adjusted for number of dietary surveys, age, sex, BMI, race, cardiovascular disease, diabetes, smoking status, physical activity, multivitamin use, regular aspirin use, regular NSAID use,  
98 total energy intake and alcohol drinking status [none drinking, moderate drinking (<2 drinks/day for men, and <1 drink/day for women), or heavy drinking (≥2 drinks/day for men, and ≥1 drink/day for

99 women)].

**Supplementary Table 4. Baseline characteristics of participants excluded because of missing covariates data and the population with complete 24-hour recall diet data and no certain disease or pregnant at baseline<sup>a</sup>**

| Characteristics                                  | Total population<br>(n=152 538) | Participants excluded<br>(n=11 088) | P value |
|--------------------------------------------------|---------------------------------|-------------------------------------|---------|
| Age, y, median (IQR)                             | 56 (13)                         | 56 (13)                             | 0.23    |
| Sex, No. (%)                                     |                                 |                                     | 0.06    |
| Female                                           | 82278 (53.9)                    | 6084 (54.9)                         |         |
| Male                                             | 70260 (46.1)                    | 5004 (45.1)                         |         |
| Race, No. (%)                                    |                                 |                                     | <.001   |
| White                                            | 138221 (91.0)                   | 9143 (86.8)                         |         |
| Multiple                                         | 4873 (3.2)                      | 530 (5.0)                           |         |
| Asian or Asian British                           | 6481 (4.3)                      | 475 (4.5)                           |         |
| Black                                            | 781 (0.5)                       | 118 (1.1)                           |         |
| Chinese                                          | 477 (0.3)                       | 70 (0.7)                            |         |
| Other ethnic group                               | 1145 (0.8)                      | 192 (1.8)                           |         |
| BMI, kg/m <sup>2</sup> , median (IQR)            | 26.2 (5.5)                      | 27.5 (6.8)                          | <.001   |
| Physical activity, METs-h per week, median (IQR) | 7.0 (13.5)                      | 6.2 (12.9)                          | <.001   |
| Alcohol drinking status <sup>c</sup> , No. (%)   |                                 |                                     | <.001   |
| None drinking                                    | 12562 (8.3)                     | 1631 (16.0)                         |         |
| Moderate drinking                                | 84025 (55.4)                    | 5463 (53.5)                         |         |
| Heavy drinking                                   | 55079 (36.3)                    | 3122 (30.6)                         |         |
| Smoking status, No. (%)                          |                                 |                                     | <.001   |
| Never smoker                                     | 87898 (57.8)                    | 5698 (53.2)                         |         |
| Former smoker                                    | 52366 (34.4)                    | 3646 (34.1)                         |         |
| Current smoker                                   | 11894 (7.8)                     | 1364 (12.7)                         |         |
| Regular aspirin use, No. (%)                     |                                 |                                     | <.001   |
| No                                               | 139389 (92.1)                   | 8991 (90.5)                         |         |
| Yes                                              | 11999 (7.9)                     | 947 (9.5)                           |         |
| Regular NSAID use, No. (%)                       |                                 |                                     | <.001   |
| No                                               | 102129 (67.5)                   | 6232 (62.7)                         |         |
| Yes                                              | 49259 (32.5)                    | 3706 (37.3)                         |         |
| Multivitamin use, No. (%)                        |                                 |                                     | <.001   |
| No                                               | 103752 (68.2)                   | 7431 (69.8)                         |         |
| Yes                                              | 48349 (31.8)                    | 3220 (30.2)                         |         |

Abbreviations: BMI, body mass index; IQR, interquartile range; METs, metabolic equivalent for task score; NSAID, nonsteroidal anti-inflammatory drug; PDI.

<sup>a</sup>The total population in this context refers to people with complete 24-hour recall diet data and excluded those with gastrointestinal disorders, cancer or pregnancy at baseline.

<sup>b</sup>Alcohol drinking status was classified as none drinking, moderate drinking (<2 drinks/day for men, and <1 drink/day for women), or heavy drinking (≥2 drinks/day for men, and ≥1 drink/day for women).

109 **Supplementary Table 5. Associations between dietary patterns and gastrointestinal disorders risk after multiple**  
 110 **imputation for missing values of covariates (n=152 538)**

| Dietary patterns | Model                | HR (95% CI) <sup>a</sup>              |                                    |                     |                     |                                    |                                            |                                |
|------------------|----------------------|---------------------------------------|------------------------------------|---------------------|---------------------|------------------------------------|--------------------------------------------|--------------------------------|
|                  |                      | Gastrointestinal disorders (n=22 936) | Inflammatory bowel disease (n=722) | Polyps (n=7 592)    | Adenoma (n=4 642)   | Irritable bowel syndrome (n=2 478) | Gastroesophageal reflux disease (n=10 979) | Peptic ulcer disease (n=1 936) |
| AHEI-2010        | Model 1 <sup>b</sup> | 0.77 (0.74, 0.80) *                   | 0.71 (0.57, 0.88) *                | 0.75 (0.70, 0.80) * | 0.78 (0.71, 0.84) * | 0.82 (0.74, 0.92) *                | 0.77 (0.73, 0.81) *                        | 0.68 (0.60, 0.77) *            |
|                  | Model 2 <sup>c</sup> | 0.84 (0.81, 0.87) *                   | 0.77 (0.62, 0.96) *                | 0.85 (0.79, 0.90) * | 0.88 (0.80, 0.95) * | 0.85 (0.75, 0.95) *                | 0.84 (0.80, 0.89) *                        | 0.75 (0.66, 0.85) *            |
| AMED             | Model 1 <sup>b</sup> | 0.77 (0.74, 0.80) *                   | 0.72 (0.57, 0.90) *                | 0.78 (0.73, 0.83) * | 0.81 (0.74, 0.88) * | 0.82 (0.73, 0.93) *                | 0.74 (0.70, 0.79) *                        | 0.66 (0.57, 0.75) *            |
|                  | Model 2 <sup>c</sup> | 0.84 (0.80, 0.87) *                   | 0.75 (0.60, 0.95) *                | 0.86 (0.80, 0.92) * | 0.90 (0.82, 0.98) * | 0.84 (0.75, 0.95) *                | 0.82 (0.77, 0.87) *                        | 0.73 (0.64, 0.84) *            |
| DASH             | Model 1 <sup>b</sup> | 0.76 (0.73, 0.79) *                   | 0.71 (0.57, 0.88) *                | 0.74 (0.69, 0.79) * | 0.75 (0.69, 0.82) * | 0.77 (0.68, 0.87) *                | 0.78 (0.73, 0.82) *                        | 0.64 (0.56, 0.73) *            |
|                  | Model 3 <sup>d</sup> | 0.84 (0.81, 0.88) *                   | 0.77 (0.62, 0.96) *                | 0.87 (0.81, 0.93) * | 0.88 (0.81, 0.96) * | 0.77 (0.69, 0.87) *                | 0.85 (0.80, 0.90) *                        | 0.73 (0.63, 0.83) *            |
| PDI              | Model 1 <sup>b</sup> | 0.85 (0.82, 0.88) *                   | 0.87 (0.71, 1.06)                  | 0.81 (0.76, 0.87) * | 0.80 (0.74, 0.86) * | 0.93 (0.84, 1.03)                  | 0.87 (0.82, 0.91) *                        | 0.71 (0.63, 0.81) *            |
|                  | Model 3 <sup>d</sup> | 0.92 (0.88, 0.95) *                   | 0.91 (0.74, 1.11)                  | 0.92 (0.86, 0.98) * | 0.91 (0.84, 0.99) * | 0.92 (0.82, 1.02)                  | 0.93 (0.88, 0.98) *                        | 0.79 (0.70, 0.90) *            |
| hPDI             | Model 1 <sup>b</sup> | 0.88 (0.85, 0.91) *                   | 0.78 (0.63, 0.96) *                | 0.86 (0.80, 0.92) * | 0.89 (0.82, 0.97) * | 0.88 (0.79, 0.99) *                | 0.90 (0.85, 0.95) *                        | 0.95 (0.83, 1.08)              |
|                  | Model 3 <sup>d</sup> | 0.91 (0.88, 0.95) *                   | 0.80 (0.64, 1.00)                  | 0.92 (0.86, 0.98) * | 0.94 (0.86, 1.02)   | 0.87 (0.77, 0.98) *                | 0.93 (0.88, 0.99) *                        | 0.95 (0.83, 1.09)              |
| uPDI             | Model 1 <sup>b</sup> | 1.19 (1.15, 1.24) *                   | 1.33 (1.08, 1.65) *                | 1.07 (1.00, 1.14) * | 1.03 (0.95, 1.12)   | 1.30 (1.16, 1.45) *                | 1.29 (1.22, 1.36) *                        | 1.32 (1.16, 1.50) *            |
|                  | Model 3 <sup>d</sup> | 1.15 (1.11, 1.19) *                   | 1.33 (1.07, 1.66) *                | 1.06 (0.99, 1.13)   | 1.01 (0.92, 1.10)   | 1.26 (1.12, 1.42) *                | 1.22 (1.16, 1.29) *                        | 1.24 (1.08, 1.41) *            |
| LCD              | Model 1 <sup>b</sup> | 0.99 (0.96, 1.03)                     | 1.06 (0.86, 1.31)                  | 1.14 (1.07, 1.22) * | 1.21 (1.11, 1.32) * | 0.92 (0.82, 1.03)                  | 0.91 (0.86, 0.96) *                        | 1.03 (0.91, 1.17)              |
|                  | Model 3 <sup>d</sup> | 0.95 (0.91, 0.99) *                   | 1.03 (0.83, 1.28)                  | 1.04 (0.98, 1.11)   | 1.11 (1.02, 1.21) * | 0.94 (0.84, 1.05)                  | 0.88 (0.84, 0.93) *                        | 0.98 (0.86, 1.11)              |
| Animal-rich LCD  | Model 1 <sup>b</sup> | 1.01 (0.98, 1.05)                     | 0.96 (0.79, 1.16)                  | 1.13 (1.06, 1.20) * | 1.21 (1.11, 1.31) * | 0.89 (0.80, 0.99) *                | 0.95 (0.91, 1.00)                          | 1.02 (0.91, 1.15)              |
|                  | Model 3 <sup>d</sup> | 0.96 (0.93, 1.00) *                   | 0.64 (0.45, 0.91) *                | 1.02 (0.96, 1.09)   | 1.09 (1.00, 1.18) * | 0.92 (0.83, 1.03)                  | 0.92 (0.87, 0.97) *                        | 0.98 (0.87, 1.10)              |
| Plant-rich LCD   | Model 1 <sup>b</sup> | 0.92 (0.89, 0.96) *                   | 1.06 (0.87, 1.29)                  | 1.00 (0.94, 1.06)   | 1.02 (0.94, 1.10)   | 0.91 (0.82, 1.02)                  | 0.87 (0.82, 0.91) *                        | 0.92 (0.81, 1.04)              |
|                  | Model 3 <sup>d</sup> | 0.93 (0.90, 0.97) *                   | 1.05 (0.86, 1.29)                  | 1.00 (0.94, 1.06)   | 1.02 (0.94, 1.11)   | 0.92 (0.82, 1.02)                  | 0.89 (0.84, 0.94) *                        | 0.92 (0.82, 1.05)              |
| GDQS             | Model 1 <sup>b</sup> | 0.83 (0.80, 0.86) *                   | 0.82 (0.66, 1.02)                  | 0.86 (0.80, 0.91) * | 0.90 (0.83, 0.97) * | 0.80 (0.72, 0.90) *                | 0.80 (0.76, 0.84) *                        | 0.77 (0.68, 0.87) *            |
|                  | Model 3 <sup>d</sup> | 0.88 (0.85, 0.91) *                   | 0.85 (0.69, 1.06)                  | 0.92 (0.86, 0.98) * | 0.96 (0.89, 1.05)   | 0.82 (0.74, 0.92) *                | 0.86 (0.82, 0.91) *                        | 0.83 (0.73, 0.94) *            |
| GDQS+            | Model 1 <sup>b</sup> | 0.85 (0.82, 0.88) *                   | 0.82 (0.66, 1.01)                  | 0.90 (0.85, 0.96) * | 0.92 (0.85, 1.00) * | 0.81 (0.73, 0.91) *                | 0.81 (0.77, 0.86) *                        | 0.79 (0.70, 0.90) *            |
|                  | Model 3 <sup>d</sup> | 0.90 (0.86, 0.93) *                   | 0.83 (0.67, 1.03)                  | 0.96 (0.90, 1.02)   | 0.99 (0.91, 1.07)   | 0.82 (0.73, 0.92) *                | 0.87 (0.82, 0.92) *                        | 0.86 (0.75, 0.97) *            |
| GDQS-            | Model 1 <sup>b</sup> | 0.97 (0.93, 1.00)                     | 0.98 (0.80, 1.19)                  | 0.96 (0.90, 1.02)   | 0.99 (0.92, 1.08)   | 0.94 (0.84, 1.04)                  | 0.97 (0.92, 1.02)                          | 1.04 (0.92, 1.17)              |

| Dietary patterns | Model                | HR (95% CI) <sup>a</sup>              |                                    |                     |                   |                                    |                                            |                                |
|------------------|----------------------|---------------------------------------|------------------------------------|---------------------|-------------------|------------------------------------|--------------------------------------------|--------------------------------|
|                  |                      | Gastrointestinal disorders (n=22 936) | Inflammatory bowel disease (n=722) | Polyps (n=7 592)    | Adenoma (n=4 642) | Irritable bowel syndrome (n=2 478) | Gastroesophageal reflux disease (n=10 979) | Peptic ulcer disease (n=1 936) |
|                  | Model 3 <sup>d</sup> | 0.97 (0.94, 1.01)                     | 1.00 (0.82, 1.23)                  | 0.97 (0.91, 1.04)   | 1.00 (0.92, 1.08) | 0.94 (0.84, 1.06)                  | 0.98 (0.93, 1.03)                          | 1.00 (0.89, 1.14)              |
| DII              | Model 1 <sup>b</sup> | 1.13 (1.09, 1.18) *                   | 1.01 (0.83, 1.24)                  | 1.06 (1.00, 1.13)   | 1.04 (0.96, 1.12) | 1.17 (1.05, 1.31) *                | 1.22 (1.15, 1.28) *                        | 1.17 (1.03, 1.32) *            |
|                  | Model 2 <sup>c</sup> | 1.13 (1.08, 1.18) *                   | 1.09 (0.85, 1.38)                  | 1.08 (1.01, 1.17) * | 1.01 (0.91, 1.11) | 1.21 (1.07, 1.38) *                | 1.20 (1.13, 1.28) *                        | 1.09 (0.94, 1.27)              |

- 111 Abbreviations: AHEI-2010, Alternate Healthy Eating Index-2010; AMED, Alternate Mediterranean Diet; CI, confidence interval; DASH, Dietary Approaches to Stop Hypertension; DII, dietary
- 112 inflammatory index; GDQS, Global Diet Quality Score; GDQS-, negative submetric of Global Diet Quality Score; GDQS+, positive submetric of Global Diet Quality Score; hPDI, healthful plant-based
- 113 diet index; HR, hazard ratio; LCD, low carbohydrate diet; PDI, plant-based diet index; uPDI, unhealthful plant-based diet index.
- 114 <sup>a</sup>HRs (95% CI) are comparing the highest quarter with the lowest quarter. *P* value <0.05 was noted with '\*'.
- 115 <sup>b</sup>Model 1 was adjusted for age and sex.
- 116 <sup>c</sup>Model 2 was adjusted for age, sex, BMI, race, cardiovascular disease, diabetes, smoking status, physical activity, multivitamin use, regular aspirin use, regular NSAID use and total energy intake.
- 117 <sup>d</sup>Model 3 was adjusted for age, sex, BMI, race, cardiovascular disease, diabetes, smoking status, physical activity, multivitamin use, regular aspirin use, regular NSAID use, total energy intake and
- 118 alcohol drinking status [none drinking, moderate drinking (<2 drinks/day for men, and <1 drink/day for women), or heavy drinking (≥2 drinks/day for men, and ≥1 drink/day for women)].

119 **Supplementary Table 6.** Associations between food groups and gastrointestinal disorders

| Food groups    |           | HR (95% CI) <sup>a</sup>                |                                       |                    |                     |                                      |                                             |                                  |
|----------------|-----------|-----------------------------------------|---------------------------------------|--------------------|---------------------|--------------------------------------|---------------------------------------------|----------------------------------|
|                |           | Gastrointestinal disorders<br>(n=20858) | Inflammatory bowel disease<br>(n=666) | Polyps<br>(n=6910) | Adenoma<br>(n=4254) | Irritable bowel syndrome<br>(n=2232) | Gastroesophageal reflux disease<br>(n=9942) | Peptic ulcer disease<br>(n=1713) |
| Vegetables     | Tertile 1 | 1 (Ref)                                 | 1 (Ref)                               | 1 (Ref)            | 1 (Ref)             | 1 (Ref)                              | 1 (Ref)                                     | 1 (Ref)                          |
|                | Tertile 2 | 0.96 (0.93, 1.00)*                      | 0.93 (0.77, 1.13)                     | 1.00 (0.94, 1.07)  | 0.98 (0.91, 1.06)   | 0.96 (0.86, 1.07)                    | 0.93 (0.88, 0.98)*                          | 0.91 (0.81, 1.03)                |
|                | Tertile 3 | 0.97 (0.93, 1.01)                       | 0.96 (0.77, 1.20)                     | 1.02 (0.95, 1.09)  | 1.04 (0.96, 1.14)   | 0.93 (0.83, 1.05)                    | 0.92 (0.87, 0.97)*                          | 0.95 (0.83, 1.09)                |
| Fruits         | Tertile 1 | 1 (Ref)                                 | 1 (Ref)                               | 1 (Ref)            | 1 (Ref)             | 1 (Ref)                              | 1 (Ref)                                     | 1 (Ref)                          |
|                | Tertile 2 | 0.95 (0.92, 0.99)*                      | 0.92 (0.76, 1.12)                     | 0.97 (0.91, 1.03)  | 0.92 (0.86, 1.00)*  | 1.00 (0.90, 1.11)                    | 0.94 (0.90, 0.99)*                          | 0.98 (0.87, 1.11)                |
|                | Tertile 3 | 0.92 (0.88, 0.95)*                      | 0.83 (0.67, 1.02)                     | 0.94 (0.88, 1.00)  | 0.92 (0.85, 1.00)*  | 0.88 (0.79, 0.99)*                   | 0.89 (0.85, 0.94)*                          | 1.06 (0.93, 1.21)                |
| Whole grains   | Tertile 1 | 1 (Ref)                                 | 1 (Ref)                               | 1 (Ref)            | 1 (Ref)             | 1 (Ref)                              | 1 (Ref)                                     | 1 (Ref)                          |
|                | Tertile 2 | 0.97 (0.93, 1.00)                       | 0.79 (0.65, 0.96)*                    | 0.96 (0.90, 1.02)  | 0.91 (0.85, 0.99)*  | 1.04 (0.93, 1.15)                    | 1.00 (0.95, 1.05)                           | 0.99 (0.88, 1.12)                |
|                | Tertile 3 | 0.95 (0.92, 0.99)*                      | 0.89 (0.72, 1.10)                     | 0.90 (0.84, 0.97)* | 0.90 (0.82, 0.98)*  | 1.07 (0.95, 1.21)                    | 0.97 (0.92, 1.03)                           | 0.95 (0.83, 1.09)                |
| Refined grains | Tertile 1 | 1 (Ref)                                 | 1 (Ref)                               | 1 (Ref)            | 1 (Ref)             | 1 (Ref)                              | 1 (Ref)                                     | 1 (Ref)                          |
|                | Tertile 2 | 0.99 (0.95, 1.02)                       | 0.90 (0.74, 1.10)                     | 0.97 (0.92, 1.03)  | 0.93 (0.86, 1.00)   | 1.05 (0.94, 1.16)                    | 1.02 (0.97, 1.07)                           | 0.95 (0.84, 1.07)                |
|                | Tertile 3 | 1.02 (0.98, 1.05)                       | 1.10 (0.90, 1.34)                     | 0.99 (0.93, 1.05)  | 0.96 (0.89, 1.04)   | 1.05 (0.94, 1.17)                    | 1.06 (1.01, 1.12)*                          | 0.97 (0.86, 1.11)                |
| Nuts and       | Tertile 1 | 1 (Ref)                                 | 1 (Ref)                               | 1 (Ref)            | 1 (Ref)             | 1 (Ref)                              | 1 (Ref)                                     | 1 (Ref)                          |

| Food groups      |           | HR (95% CI) <sup>a</sup>                |                                       |                    |                     |                                      |                                             |                                  |
|------------------|-----------|-----------------------------------------|---------------------------------------|--------------------|---------------------|--------------------------------------|---------------------------------------------|----------------------------------|
|                  |           | Gastrointestinal disorders<br>(n=20858) | Inflammatory bowel disease<br>(n=666) | Polyps<br>(n=6910) | Adenoma<br>(n=4254) | Irritable bowel syndrome<br>(n=2232) | Gastroesophageal reflux disease<br>(n=9942) | Peptic ulcer disease<br>(n=1713) |
| legumes          | 1         |                                         |                                       |                    |                     |                                      |                                             |                                  |
|                  | Tertile 2 | 0.99 (0.96, 1.02)                       | 0.94 (0.78, 1.13)                     | 0.96 (0.91, 1.02)  | 1.08 (1.00, 1.17)*  | 0.94 (0.85, 1.04)                    | 1.00 (0.95, 1.05)                           | 0.99 (0.88, 1.11)                |
|                  | Tertile 3 | 0.97 (0.93, 1.00)                       | 0.88 (0.71, 1.09)                     | 1.01 (0.94, 1.07)  | 1.07 (0.98, 1.16)   | 0.93 (0.83, 1.04)                    | 0.96 (0.91, 1.01)                           | 0.91 (0.80, 1.04)                |
| Red meat         | Tertile 1 | 1 (Ref)                                 | 1 (Ref)                               | 1 (Ref)            | 1 (Ref)             | 1 (Ref)                              | 1 (Ref)                                     | 1 (Ref)                          |
|                  | Tertile 2 | 1.00 (0.94, 1.06)                       | 1.01 (0.72, 1.42)                     | 1.01 (0.91, 1.12)  | 1.02 (0.89, 1.17)   | 0.77 (0.63, 0.94)*                   | 1.00 (0.92, 1.09)                           | 1.15 (0.94, 1.41)                |
|                  | Tertile 3 | 0.99 (0.96, 1.02)                       | 1.02 (0.86, 1.20)                     | 1.02 (0.97, 1.08)  | 1.05 (0.99, 1.12)   | 0.92 (0.84, 1.00)                    | 0.98 (0.94, 1.02)                           | 0.93 (0.84, 1.03)                |
| Processed meat   | Tertile 1 | 1 (Ref)                                 | 1 (Ref)                               | 1 (Ref)            | 1 (Ref)             | 1 (Ref)                              | 1 (Ref)                                     | 1 (Ref)                          |
|                  | Tertile 2 | 0.98 (0.94, 1.02)                       | 0.80 (0.63, 1.00)                     | 1.01 (0.94, 1.08)  | 1.04 (0.96, 1.14)   | 0.96 (0.85, 1.08)                    | 0.98 (0.92, 1.03)                           | 0.96 (0.84, 1.11)                |
|                  | Tertile 3 | 1.02 (0.98, 1.05)                       | 0.93 (0.77, 1.11)                     | 1.06 (1.00, 1.12)* | 1.03 (0.96, 1.11)   | 1.06 (0.96, 1.18)                    | 0.97 (0.92, 1.02)                           | 1.12 (1.00, 1.26)*               |
| Poultry          | Tertile 1 | 1 (Ref)                                 | 1 (Ref)                               | 1 (Ref)            | 1 (Ref)             | 1 (Ref)                              | 1 (Ref)                                     | 1 (Ref)                          |
|                  | Tertile 2 | 1.02 (0.97, 1.08)                       | 0.97 (0.72, 1.31)                     | 1.09 (1.00, 1.20)* | 1.02 (0.91, 1.15)   | 0.91 (0.78, 1.08)                    | 1.10 (1.02, 1.18)*                          | 0.92 (0.76, 1.11)                |
|                  | Tertile 3 | 1.01 (0.98, 1.04)                       | 1.03 (0.87, 1.22)                     | 1.03 (0.97, 1.08)  | 1.05 (0.99, 1.13)   | 1.04 (0.95, 1.14)                    | 1.01 (0.97, 1.06)                           | 0.95 (0.85, 1.06)                |
| Fish and seafood | Tertile 1 | 1 (Ref)                                 | 1 (Ref)                               | 1 (Ref)            | 1 (Ref)             | 1 (Ref)                              | 1 (Ref)                                     | 1 (Ref)                          |
|                  | Tertile   | 0.95 (0.89, 1.01)                       | 1.08 (0.77, 1.50)                     | 0.93 (0.83, 1.04)  | 1.10 (0.96, 1.26)   | 0.79 (0.64, 0.96)*                   | 0.90 (0.82, 0.99)*                          | 0.91 (0.72, 1.14)                |



| Food groups    |           | HR (95% CI) <sup>a</sup>                |                                       |                    |                     |                                      |                                             |                                  |
|----------------|-----------|-----------------------------------------|---------------------------------------|--------------------|---------------------|--------------------------------------|---------------------------------------------|----------------------------------|
|                |           | Gastrointestinal disorders<br>(n=20858) | Inflammatory bowel disease<br>(n=666) | Polyps<br>(n=6910) | Adenoma<br>(n=4254) | Irritable bowel syndrome<br>(n=2232) | Gastroesophageal reflux disease<br>(n=9942) | Peptic ulcer disease<br>(n=1713) |
|                | 2         |                                         |                                       |                    |                     |                                      |                                             |                                  |
|                | Tertile 3 | 0.96 (0.93, 0.99)*                      | 0.93 (0.79, 1.10)                     | 0.96 (0.92, 1.01)  | 1.03 (0.96, 1.10)   | 0.93 (0.85, 1.02)                    | 0.93 (0.89, 0.97)*                          | 0.91 (0.82, 1.01)                |
| Eggs           | Tertile 1 | 1 (Ref)                                 | 1 (Ref)                               | 1 (Ref)            | 1 (Ref)             | 1 (Ref)                              | 1 (Ref)                                     | 1 (Ref)                          |
|                | Tertile 2 | 0.97 (0.88, 1.06)                       | 1.15 (0.71, 1.88)                     | 0.87 (0.73, 1.03)  | 0.91 (0.74, 1.13)   | 1.07 (0.83, 1.38)                    | 1.01 (0.88, 1.15)                           | 0.83 (0.58, 1.17)                |
|                | Tertile 3 | 1.02 (0.99, 1.05)                       | 1.15 (0.98, 1.36)                     | 1.00 (0.95, 1.06)  | 1.05 (0.98, 1.12)   | 1.00 (0.91, 1.10)                    | 1.01 (0.96, 1.05)                           | 0.96 (0.86, 1.06)                |
| Low-fat dairy  | Tertile 1 | 1 (Ref)                                 | 1 (Ref)                               | 1 (Ref)            | 1 (Ref)             | 1 (Ref)                              | 1 (Ref)                                     | 1 (Ref)                          |
|                | Tertile 2 | 1.02 (0.99, 1.06)                       | 1.10 (0.91, 1.34)                     | 1.02 (0.96, 1.09)  | 0.93 (0.87, 1.01)   | 0.89 (0.80, 0.99)*                   | 1.06 (1.01, 1.12)*                          | 0.93 (0.82, 1.05)                |
|                | Tertile 3 | 1.01 (0.98, 1.05)                       | 1.10 (0.90, 1.35)                     | 0.99 (0.93, 1.05)  | 0.93 (0.86, 1.01)   | 0.87 (0.78, 0.97)*                   | 1.08 (1.02, 1.13)*                          | 0.93 (0.82, 1.06)                |
| High-fat dairy | Tertile 1 | 1 (Ref)                                 | 1 (Ref)                               | 1 (Ref)            | 1 (Ref)             | 1 (Ref)                              | 1 (Ref)                                     | 1 (Ref)                          |
|                | Tertile 2 | 0.95 (0.91, 0.98)*                      | 1.12 (0.91, 1.38)                     | 1.01 (0.94, 1.07)  | 0.91 (0.84, 0.99)*  | 0.94 (0.84, 1.05)                    | 0.92 (0.87, 0.97)*                          | 0.90 (0.79, 1.02)                |
|                | Tertile 3 | 0.92 (0.89, 0.95)*                      | 1.11 (0.93, 1.34)                     | 0.99 (0.93, 1.04)  | 0.92 (0.86, 0.99)*  | 0.81 (0.73, 0.90)*                   | 0.88 (0.84, 0.92)*                          | 0.89 (0.80, 1.00)*               |
| Potatoes       | Tertile 1 | 1 (Ref)                                 | 1 (Ref)                               | 1 (Ref)            | 1 (Ref)             | 1 (Ref)                              | 1 (Ref)                                     | 1 (Ref)                          |
|                | Tertile 2 | 1.02 (0.99, 1.06)                       | 1.01 (0.83, 1.22)                     | 0.99 (0.93, 1.05)  | 0.98 (0.91, 1.06)   | 1.12 (1.00, 1.24)*                   | 1.01 (0.96, 1.07)                           | 0.98 (0.86, 1.11)                |
|                | Tertile 3 | 1.06 (1.01, 1.11)*                      | 1.01 (0.78, 1.31)                     | 0.97 (0.89, 1.05)  | 1.06 (0.96, 1.17)   | 1.21 (1.05, 1.39)*                   | 1.05 (0.99, 1.13)                           | 1.12 (0.96, 1.32)                |

| Food groups                |           | HR (95% CI) <sup>a</sup>                |                                       |                    |                     |                                      |                                             |                                  |
|----------------------------|-----------|-----------------------------------------|---------------------------------------|--------------------|---------------------|--------------------------------------|---------------------------------------------|----------------------------------|
|                            |           | Gastrointestinal disorders<br>(n=20858) | Inflammatory bowel disease<br>(n=666) | Polyps<br>(n=6910) | Adenoma<br>(n=4254) | Irritable bowel syndrome<br>(n=2232) | Gastroesophageal reflux disease<br>(n=9942) | Peptic ulcer disease<br>(n=1713) |
|                            | 3         |                                         |                                       |                    |                     |                                      |                                             |                                  |
| Purchased deep fried foods | Tertile 1 | 1 (Ref)                                 | 1 (Ref)                               | 1 (Ref)            | 1 (Ref)             | 1 (Ref)                              | 1 (Ref)                                     | 1 (Ref)                          |
|                            | Tertile 2 | 1.00 (0.91, 1.10)                       | 0.74 (0.39, 1.38)                     | 0.97 (0.81, 1.15)  | 1.06 (0.86, 1.31)   | 1.15 (0.88, 1.49)                    | 1.01 (0.88, 1.16)                           | 1.04 (0.74, 1.45)                |
|                            | Tertile 3 | 1.03 (0.99, 1.06)                       | 1.03 (0.85, 1.24)                     | 1.06 (1.00, 1.13)* | 1.01 (0.93, 1.08)   | 0.90 (0.81, 1.00)*                   | 1.05 (1.00, 1.10)                           | 0.98 (0.87, 1.10)                |
| Sweets and desserts        | Tertile 1 | 1 (Ref)                                 | 1 (Ref)                               | 1 (Ref)            | 1 (Ref)             | 1 (Ref)                              | 1 (Ref)                                     | 1 (Ref)                          |
|                            | Tertile 2 | 1.02 (0.98, 1.05)                       | 1.05 (0.87, 1.27)                     | 1.01 (0.95, 1.07)  | 0.94 (0.87, 1.01)   | 1.07 (0.96, 1.19)                    | 1.03 (0.98, 1.09)                           | 0.92 (0.82, 1.03)                |
|                            | Tertile 3 | 1.02 (0.98, 1.06)                       | 1.01 (0.82, 1.24)                     | 1.01 (0.94, 1.07)  | 0.89 (0.82, 0.96)*  | 1.15 (1.03, 1.29)*                   | 1.06 (1.01, 1.12)*                          | 0.94 (0.82, 1.06)                |
| Sugar-sweetened beverages  | Tertile 1 | 1 (Ref)                                 | 1 (Ref)                               | 1 (Ref)            | 1 (Ref)             | 1 (Ref)                              | 1 (Ref)                                     | 1 (Ref)                          |
|                            | Tertile 2 | 1.07 (1.01, 1.13)*                      | 1.12 (0.82, 1.53)                     | 1.08 (0.98, 1.19)  | 1.08 (0.96, 1.22)   | 1.09 (0.91, 1.30)                    | 1.07 (0.98, 1.16)                           | 0.96 (0.78, 1.18)                |
|                            | Tertile 3 | 1.07 (1.04, 1.10)*                      | 1.13 (0.96, 1.33)                     | 1.03 (0.98, 1.08)  | 1.00 (0.93, 1.06)   | 1.11 (1.02, 1.22)*                   | 1.09 (1.05, 1.14)*                          | 1.08 (0.97, 1.19)                |
| Juice                      | Tertile 1 | 1 (Ref)                                 | 1 (Ref)                               | 1 (Ref)            | 1 (Ref)             | 1 (Ref)                              | 1 (Ref)                                     | 1 (Ref)                          |
|                            | Tertile 2 | 0.97 (0.94, 1.01)                       | 1.15 (0.93, 1.42)                     | 0.97 (0.90, 1.04)  | 0.97 (0.89, 1.06)   | 0.97 (0.86, 1.09)                    | 0.91 (0.86, 0.97)*                          | 0.98 (0.85, 1.12)                |
|                            | Tertile 3 | 0.96 (0.93, 0.99)*                      | 1.00 (0.84, 1.20)                     | 1.00 (0.95, 1.05)  | 0.94 (0.87, 1.00)   | 0.98 (0.89, 1.08)                    | 0.94 (0.90, 0.98)*                          | 0.95 (0.85, 1.06)                |
| Tea and coffee             | Tertile   | 1 (Ref)                                 | 1 (Ref)                               | 1 (Ref)            | 1 (Ref)             | 1 (Ref)                              | 1 (Ref)                                     | 1 (Ref)                          |

| Food groups             |           | HR (95% CI) <sup>a</sup>                |                                       |                    |                     |                                      |                                             |                                  |
|-------------------------|-----------|-----------------------------------------|---------------------------------------|--------------------|---------------------|--------------------------------------|---------------------------------------------|----------------------------------|
|                         |           | Gastrointestinal disorders<br>(n=20858) | Inflammatory bowel disease<br>(n=666) | Polyps<br>(n=6910) | Adenoma<br>(n=4254) | Irritable bowel syndrome<br>(n=2232) | Gastroesophageal reflux disease<br>(n=9942) | Peptic ulcer disease<br>(n=1713) |
|                         | 1         |                                         |                                       |                    |                     |                                      |                                             |                                  |
|                         | Tertile 2 | 1.00 (0.96, 1.03)                       | 0.85 (0.69, 1.04)                     | 1.00 (0.94, 1.06)  | 1.01 (0.93, 1.09)   | 1.00 (0.90, 1.12)                    | 1.04 (0.99, 1.09)                           | 0.88 (0.78, 0.99)*               |
|                         | Tertile 3 | 0.98 (0.95, 1.02)                       | 0.89 (0.73, 1.07)                     | 0.98 (0.92, 1.04)  | 0.98 (0.91, 1.06)   | 1.01 (0.91, 1.12)                    | 1.02 (0.97, 1.08)                           | 0.89 (0.79, 1.01)                |
| Fruits and whole grains | Tertile 1 | 1 (Ref)                                 | 1 (Ref)                               | 1 (Ref)            | 1 (Ref)             | 1 (Ref)                              | 1 (Ref)                                     | 1 (Ref)                          |
|                         | Tertile 2 | 0.95 (0.92, 0.99)*                      | 0.86 (0.71, 1.04)                     | 0.95 (0.89, 1.01)  | 0.91 (0.85, 0.98)*  | 0.97 (0.87, 1.07)                    | 0.96 (0.92, 1.01)                           | 1.02 (0.90, 1.15)                |
|                         | Tertile 3 | 0.89 (0.86, 0.93)*                      | 0.81 (0.65, 1.00)                     | 0.87 (0.81, 0.93)* | 0.85 (0.78, 0.93)*  | 0.91 (0.81, 1.03)                    | 0.89 (0.84, 0.94)*                          | 1.01 (0.88, 1.16)                |

120 Abbreviations: CI, confidence interval; HR, hazard ratio.

121 <sup>a</sup>HRs (95% CI) are comparing the highest with the lowest tertiles. *P* value <0.05 was noted with '\*'.

122 The model for food group was adjusted for age, sex, BMI, race, cardiovascular disease, diabetes, smoking status, physical activity, multivitamin use, regular aspirin use, regular NSAID use, total

123 energy intake, alcohol drinking status [none drinking, moderate drinking (<2 drinks/day for men, and <1 drink/day for women), or heavy drinking (≥2 drinks/day for men, and ≥1 drink/day for women)]

124 and intakes of other food groups.

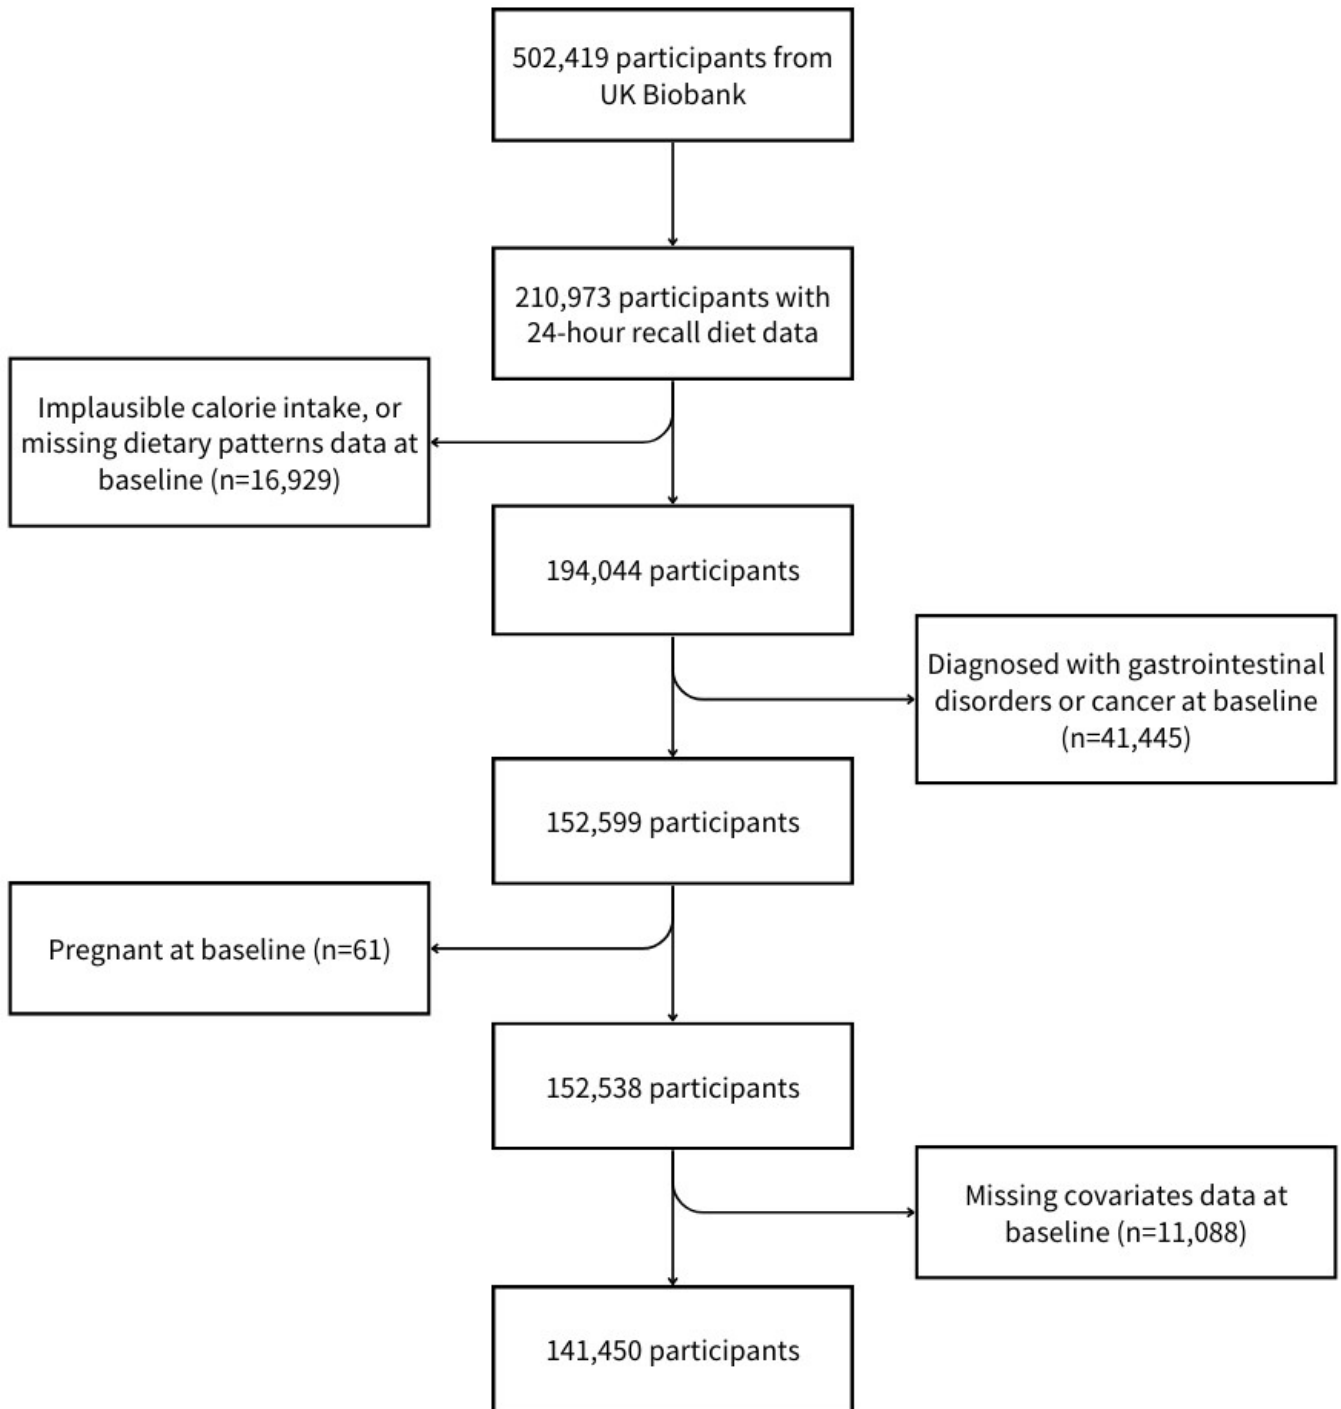

125  
126 **Supplementary Figure 1. Flowchart of participants included in the analyses.**

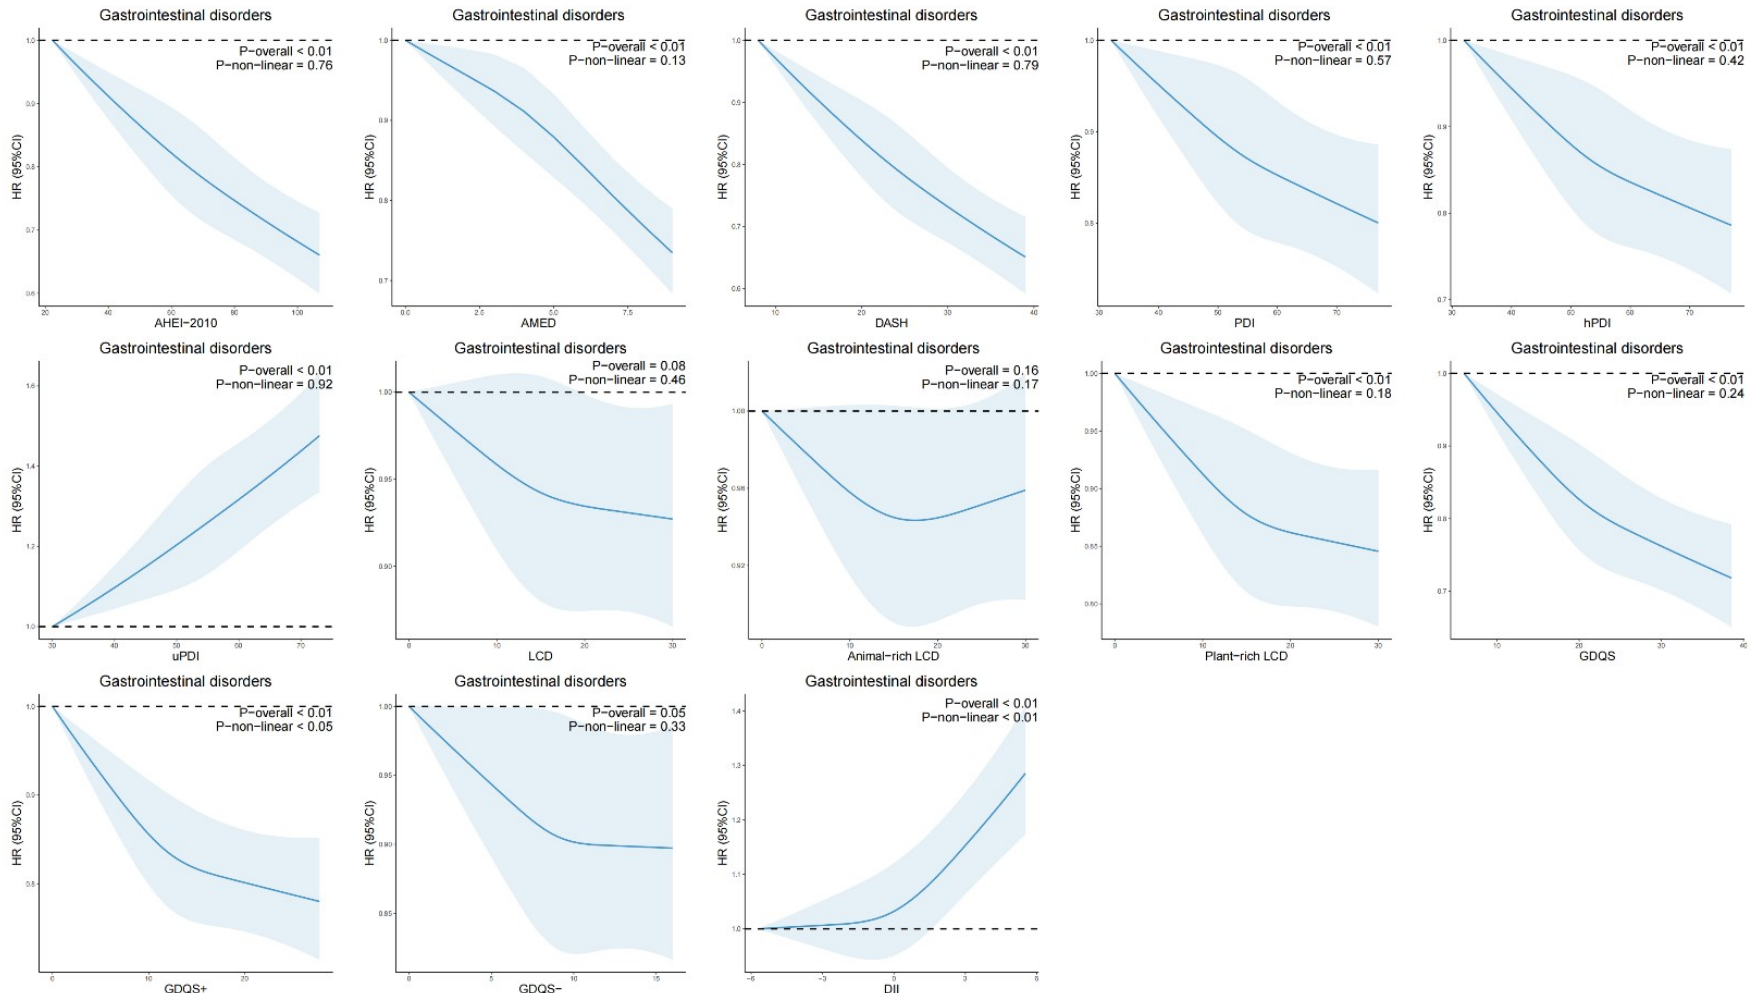

127

128 **Supplementary Figure 2. Multivariable-adjusted cubic spline analysis of dietary pattern scores with the risk of gastrointestinal disorders.** Models for AHEI-2010, AMED and DII were  
 129 adjusted for age, sex, BMI, race, cardiovascular disease, diabetes, smoking status, physical activity, multivitamin use, regular aspirin use, regular NSAID use and total energy intake. Models for  
 130 DASH, PDI, hPDI, uPDI, LCD, animal-rich LCD, plant-rich LCD, GDQS, GDQS+ and GDQS- were adjusted for age, sex, BMI, race, cardiovascular disease, diabetes, smoking status, physical  
 131 activity, multivitamin use, regular aspirin use, regular NSAID use, total energy intake and alcohol drinking status [none drinking, moderate drinking (<2 drinks/day for men, and <1 drink/day for  
 132 women), or heavy drinking ( $\geq 2$  drinks/day for men, and  $\geq 1$  drink/day for women)].  
 133 Abbreviations: AHEI-2010, Alternate Healthy Eating Index-2010; AMED, Alternate Mediterranean Diet; CI, confidence interval; DASH, Dietary Approaches to Stop Hypertension; DII, dietary  
 134 inflammatory index; GDQS, Global Diet Quality Score; GDQS-, negative submetric of Global Diet Quality Score; GDQS+, positive submetric of Global Diet Quality Score; hPDI, healthful plant-based  
 135 diet index; HR, hazard ratio; LCD, low carbohydrate diet; PDI, plant-based diet index; uPDI, unhealthful plant-based diet index.

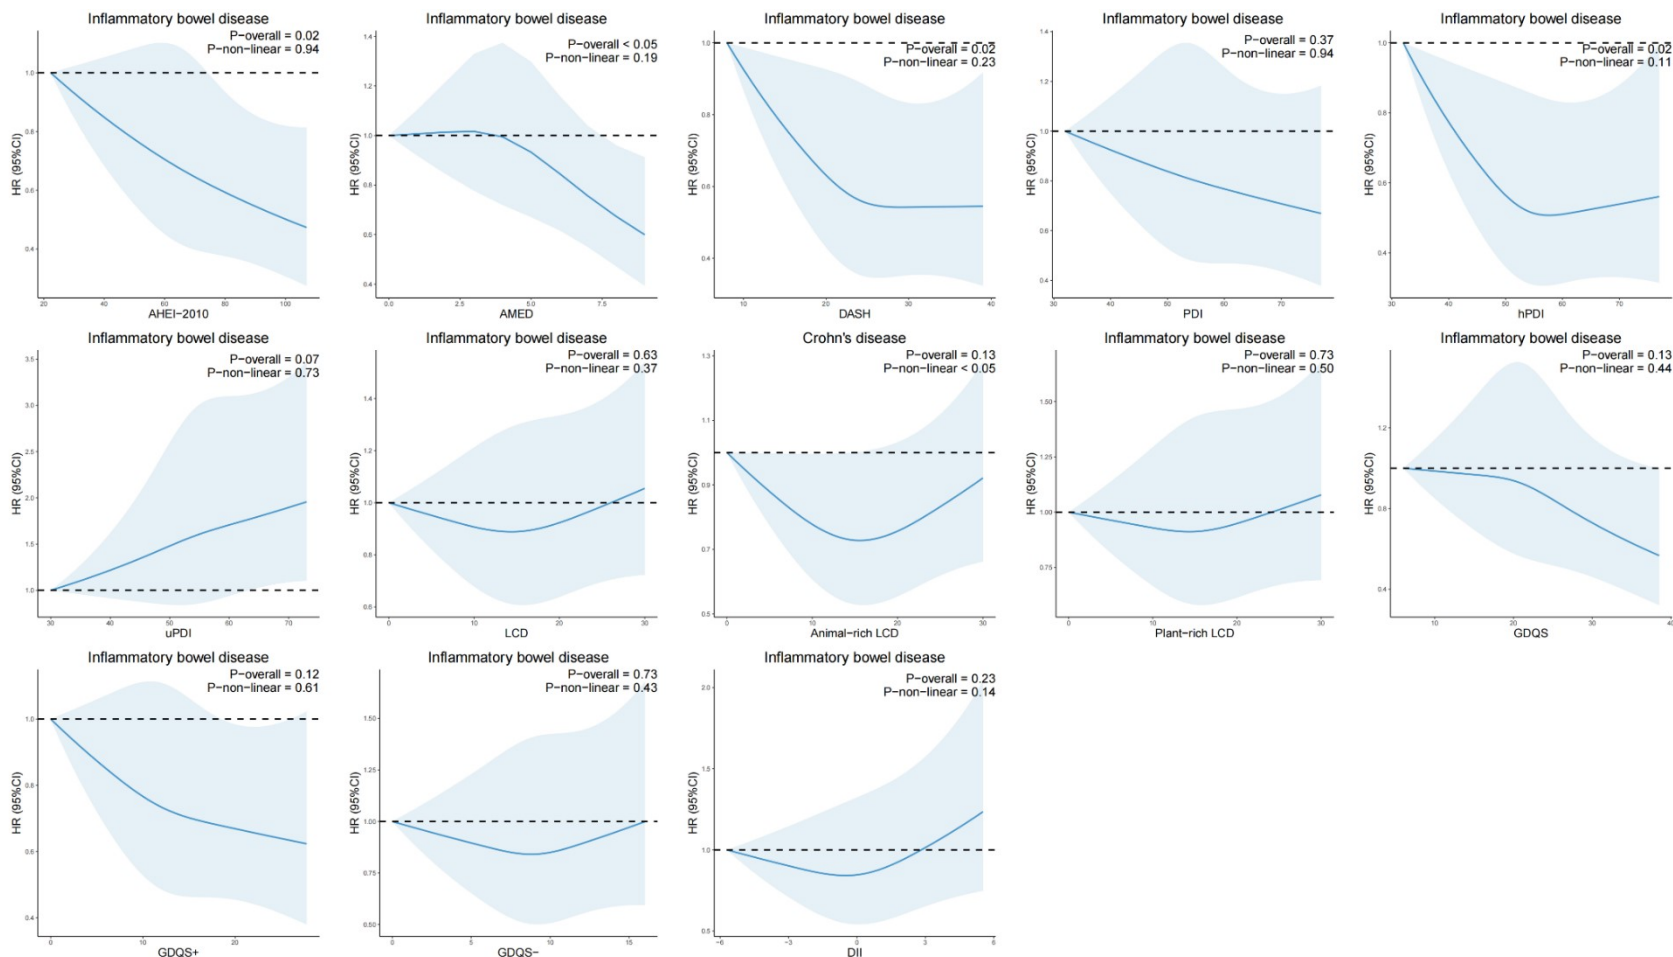

136

137 **Supplementary Figure 3. Multivariable-adjusted cubic spline analysis of dietary pattern scores with the risk of inflammatory bowel disease.** Models for AHEI-2010, AMED and DII were

138 adjusted for age, sex, BMI, race, cardiovascular disease, diabetes, smoking status, physical activity, multivitamin use, regular aspirin use, regular NSAID use and total energy intake. Models for

139 DASH, PDI, hPDI, uPDI, LCD, animal-rich LCD, plant-rich LCD, GDQS, GDQS+ and GDQS- were adjusted for age, sex, BMI, race, cardiovascular disease, diabetes, smoking status, physical

140 activity, multivitamin use, regular aspirin use, regular NSAID use, total energy intake and alcohol drinking status [none drinking, moderate drinking (<2 drinks/day for men, and <1 drink/day for

141 women), or heavy drinking (≥2 drinks/day for men, and ≥1 drink/day for women)].

142 Abbreviations: AHEI-2010, Alternate Healthy Eating Index-2010; AMED, Alternate Mediterranean Diet; CI, confidence interval; DASH, Dietary Approaches to Stop Hypertension; DII, dietary

143 inflammatory index; GDQS, Global Diet Quality Score; GDQS-, negative submetric of Global Diet Quality Score; GDQS+, positive submetric of Global Diet Quality Score; hPDI, healthful plant-based

144 diet index; HR, hazard ratio; LCD, low carbohydrate diet; PDI, plant-based diet index; uPDI, unhealthful plant-based diet index.

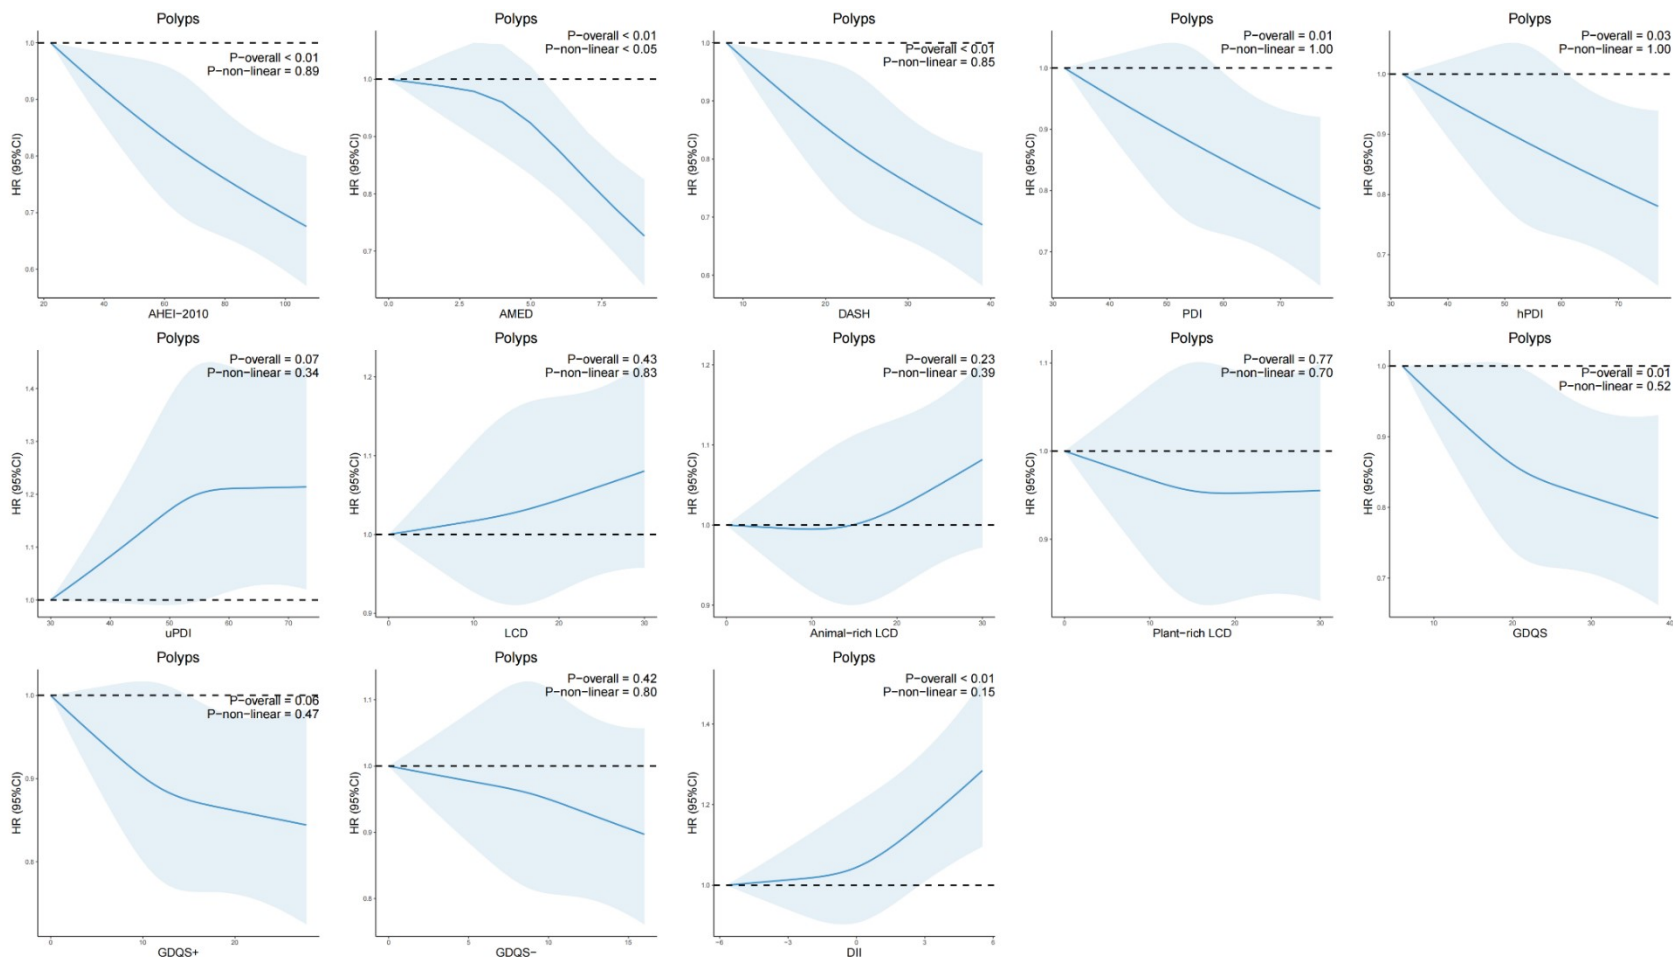

145

146 **Supplementary Figure 4. Multivariable-adjusted cubic spline analysis of dietary pattern scores with the risk of polyps.** Models for AHEI-2010, AMED and DII were adjusted for age, sex,  
 147 BMI, race, cardiovascular disease, diabetes, smoking status, physical activity, multivitamin use, regular aspirin use, regular NSAID use and total energy intake. Models for DASH, PDI, hPDI, uPDI,  
 148 LCD, animal-rich LCD, plant-rich LCD, GDQS, GDQS+ and GDQS- were adjusted for age, sex, BMI, race, cardiovascular disease, diabetes, smoking status, physical activity, multivitamin use,  
 149 regular aspirin use, regular NSAID use, total energy intake and alcohol drinking status [none drinking, moderate drinking (<2 drinks/day for men, and <1 drink/day for women), or heavy drinking (≥2  
 150 drinks/day for men, and ≥1 drink/day for women)].

151 Abbreviations: AHEI-2010, Alternate Healthy Eating Index-2010; AMED, Alternate Mediterranean Diet; CI, confidence interval; DASH, Dietary Approaches to Stop Hypertension; DII, dietary  
 152 inflammatory index; GDQS, Global Diet Quality Score; GDQS-, negative submetric of Global Diet Quality Score; GDQS+, positive submetric of Global Diet Quality Score; hPDI, healthful plant-based  
 153 diet index; HR, hazard ratio; LCD, low carbohydrate diet; PDI, plant-based diet index; uPDI, unhealthful plant-based diet index.

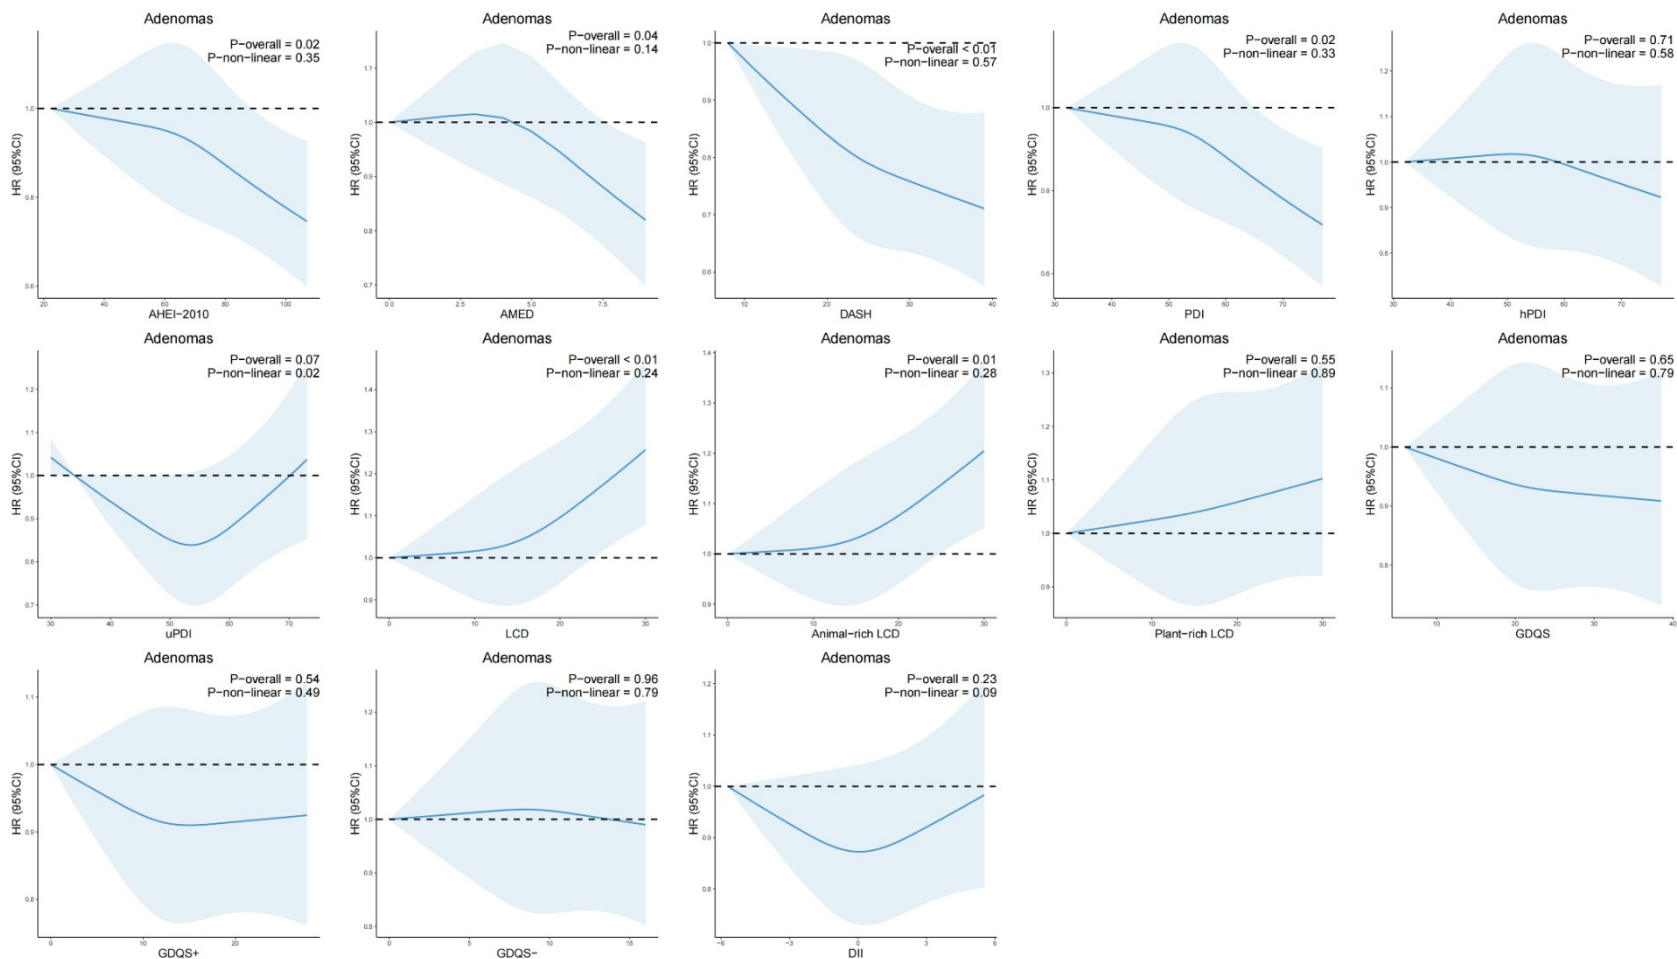

154

155 **Supplementary Figure 5. Multivariable-adjusted cubic spline analysis of dietary pattern scores with the risk of adenomas.** Models for AHEI-2010, AMED and DII were adjusted for age, sex,

156 BMI, race, cardiovascular disease, diabetes, smoking status, physical activity, multivitamin use, regular aspirin use, regular NSAID use and total energy intake. Models for DASH, PDI, hPDI, uPDI,

157 LCD, animal-rich LCD, plant-rich LCD, GDQS, GDQS+ and GDQS- were adjusted for age, sex, BMI, race, cardiovascular disease, diabetes, smoking status, physical activity, multivitamin use,

158 regular aspirin use, regular NSAID use, total energy intake and alcohol drinking status [none drinking, moderate drinking (<2 drinks/day for men, and <1 drink/day for women), or heavy drinking (≥2

159 drinks/day for men, and ≥1 drink/day for women)].

160 Abbreviations: AHEI-2010, Alternate Healthy Eating Index-2010; AMED, Alternate Mediterranean Diet; CI, confidence interval; DASH, Dietary Approaches to Stop Hypertension; DII, dietary

161 inflammatory index; GDQS, Global Diet Quality Score; GDQS-, negative submetric of Global Diet Quality Score; GDQS+, positive submetric of Global Diet Quality Score; hPDI, healthful plant-based

162 diet index; HR, hazard ratio; LCD, low carbohydrate diet; PDI, plant-based diet index; uPDI, unhealthful plant-based diet index.



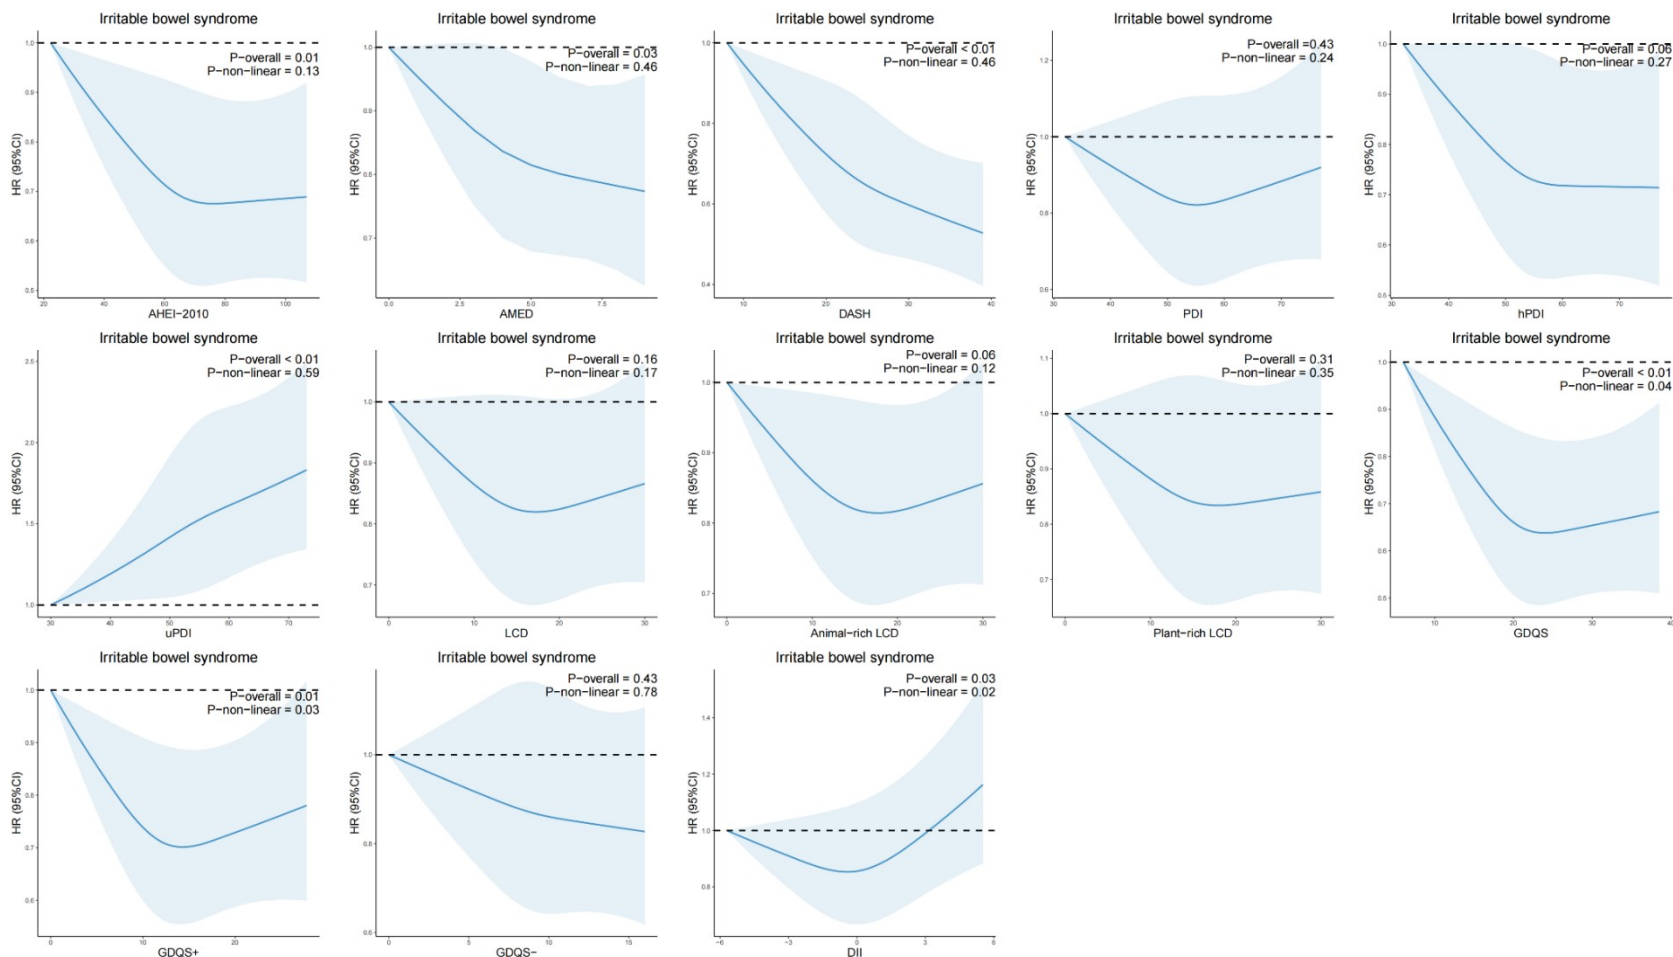

163

164 **Supplementary Figure 6. Multivariable-adjusted cubic spline analysis of dietary pattern scores with the risk of irritable bowel syndrome.** Models for AHEI-2010, AMED and DII were

165 adjusted for age, sex, BMI, race, cardiovascular disease, diabetes, smoking status, physical activity, multivitamin use, regular aspirin use, regular NSAID use and total energy intake. Models for

166 DASH, PDI, hPDI, uPDI, LCD, animal-rich LCD, plant-rich LCD, GDQS, GDQS+ and GDQS- were adjusted for age, sex, BMI, race, cardiovascular disease, diabetes, smoking status, physical

167 activity, multivitamin use, regular aspirin use, regular NSAID use, total energy intake and alcohol drinking status [none drinking, moderate drinking (<2 drinks/day for men, and <1 drink/day for

168 women), or heavy drinking (≥2 drinks/day for men, and ≥1 drink/day for women)].

169 Abbreviations: AHEI-2010, Alternate Healthy Eating Index-2010; AMED, Alternate Mediterranean Diet; CI, confidence interval; DASH, Dietary Approaches to Stop Hypertension; DII, dietary

170 inflammatory index; GDQS, Global Diet Quality Score; GDQS-, negative submetric of Global Diet Quality Score; GDQS+, positive submetric of Global Diet Quality Score; hPDI, healthful plant-based

171 diet index; HR, hazard ratio; LCD, low carbohydrate diet; PDI, plant-based diet index; uPDI, unhealthful plant-based diet index.

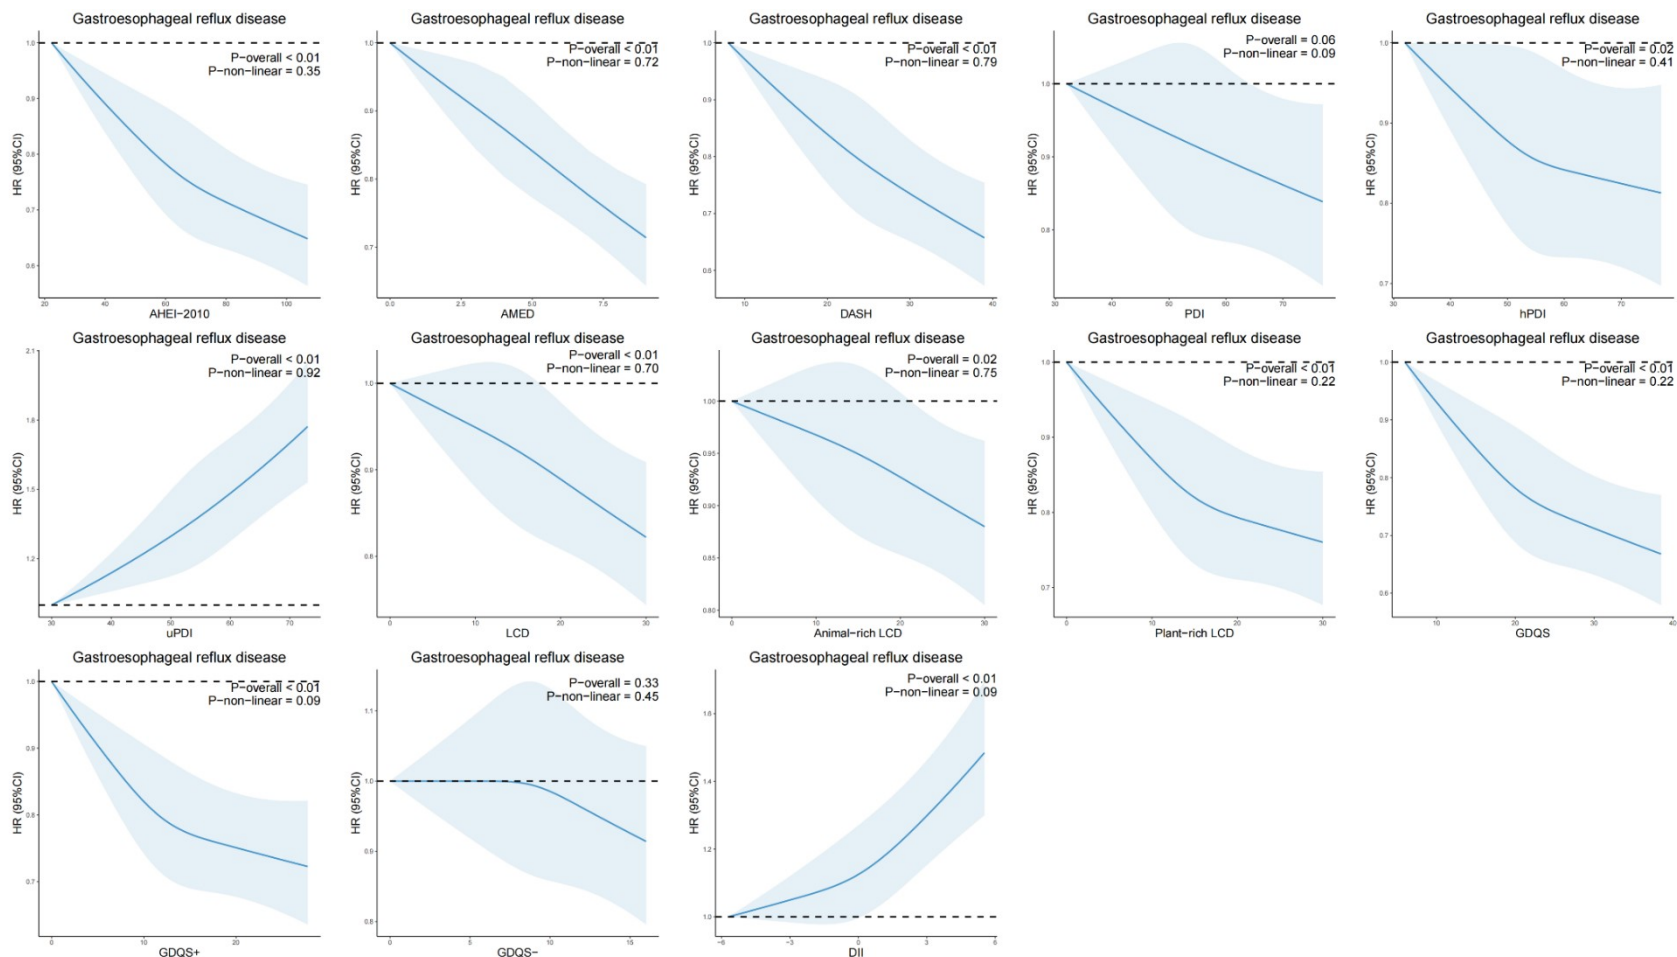

172

173 **Supplementary Figure 7. Multivariable-adjusted cubic spline analysis of dietary pattern scores with the risk of gastroesophageal reflux disease.** Models for AHEI-2010, AMED and DII

174 were adjusted for age, sex, BMI, race, cardiovascular disease, diabetes, smoking status, physical activity, multivitamin use, regular aspirin use, regular NSAID use and total energy intake. Models

175 for DASH, PDI, hPDI, uPDI, LCD, animal-rich LCD, plant-rich LCD, GDQS, GDQS+ and GDQS- were adjusted for age, sex, BMI, race, cardiovascular disease, diabetes, smoking status, physical

176 activity, multivitamin use, regular aspirin use, regular NSAID use, total energy intake and alcohol drinking status [none drinking, moderate drinking (<2 drinks/day for men, and <1 drink/day for

177 women), or heavy drinking ( $\geq 2$  drinks/day for men, and  $\geq 1$  drink/day for women)].

178 Abbreviations: AHEI-2010, Alternate Healthy Eating Index-2010; AMED, Alternate Mediterranean Diet; CI, confidence interval; DASH, Dietary Approaches to Stop Hypertension; DII, dietary

179 inflammatory index; GDQS, Global Diet Quality Score; GDQS-, negative submetric of Global Diet Quality Score; GDQS+, positive submetric of Global Diet Quality Score; hPDI, healthful plant-based

180 diet index; HR, hazard ratio; LCD, low carbohydrate diet; PDI, plant-based diet index; uPDI, unhealthful plant-based diet index.

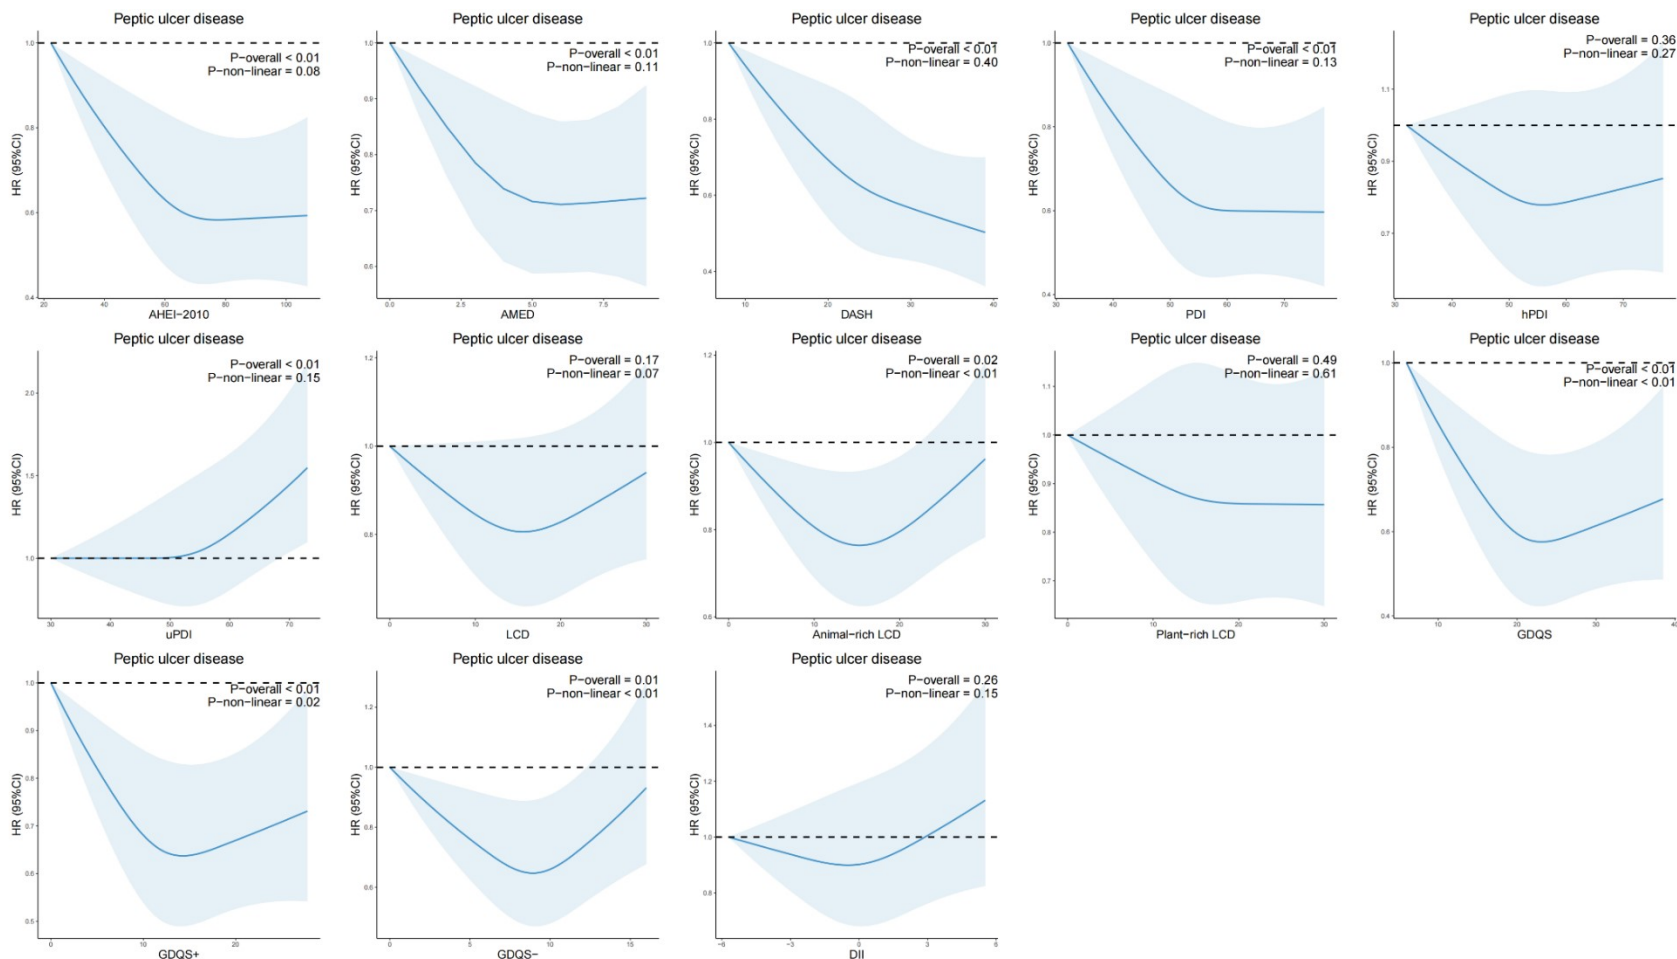

181

182 **Supplementary Figure 8. Multivariable-adjusted cubic spline analysis of dietary pattern scores with the risk of peptic ulcer disease.** Models for AHEI-2010, AMED and DII were adjusted

183 for age, sex, BMI, race, cardiovascular disease, diabetes, smoking status, physical activity, multivitamin use, regular aspirin use, regular NSAID use and total energy intake. Models for DASH, PDI,

184 hPDI, uPDI, LCD, animal-rich LCD, plant-rich LCD, GDQS, GDQS+ and GDQS- were adjusted for age, sex, BMI, race, cardiovascular disease, diabetes, smoking status, physical activity,

185 multivitamin use, regular aspirin use, regular NSAID use, total energy intake and alcohol drinking status [none drinking, moderate drinking (<2 drinks/day for men, and <1 drink/day for women), or

186 heavy drinking ( $\geq 2$  drinks/day for men, and  $\geq 1$  drink/day for women)].

187 Abbreviations: AHEI-2010, Alternate Healthy Eating Index-2010; AMED, Alternate Mediterranean Diet; CI, confidence interval; DASH, Dietary Approaches to Stop Hypertension; DII, dietary

188 inflammatory index; GDQS, Global Diet Quality Score; GDQS-, negative submetric of Global Diet Quality Score; GDQS+, positive submetric of Global Diet Quality Score; hPDI, healthful plant-based

189 diet index; HR, hazard ratio; LCD, low carbohydrate diet; PDI, plant-based diet index; uPDI, unhealthful plant-based diet index.

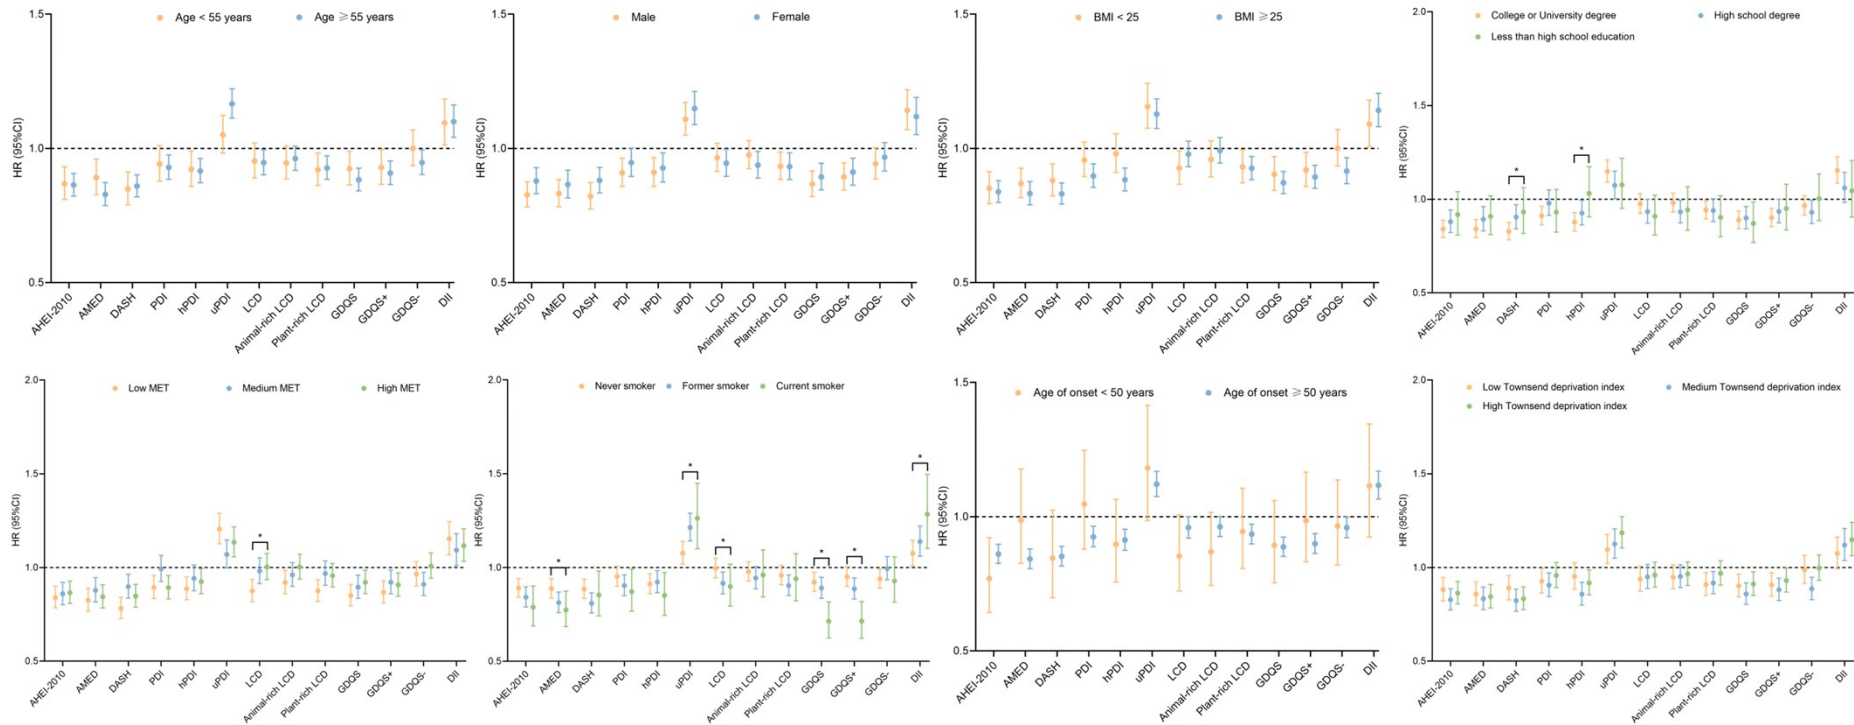

190

191 **Supplementary Figure 9. The associations between dietary patterns and gastrointestinal disorders in subgroups.** The HRs (95% CIs) were calculated by comparing the highest with the  
 192 lowest quarter. The HRs are indicated by the circles and the 95% CIs are reflected by the error bars. The models for AHEI-2010, AMED and DII were adjusted for age, sex, BMI, race, cardiovascular  
 193 disease, diabetes, smoking status, physical activity, multivitamin use, regular aspirin use, regular NSAID use and total energy intake. Models for DASH, PDI, hPDI, uPDI, LCD, animal-rich LCD,  
 194 plant-rich LCD, GDQS, GDQS+ and GDQS- were adjusted for age, sex, BMI, race, cardiovascular disease, diabetes, smoking status, physical activity, multivitamin use, regular aspirin use, regular  
 195 NSAID use, total energy intake and alcohol drinking status [none drinking, moderate drinking (<2 drinks/day for men, and <1 drink/day for women), or heavy drinking (≥2 drinks/day for men, and ≥1  
 196 drink/day for women)]. *P* for trend <0.05 was noted with '\*'. Low MET: lowest tertile of MET; medium MET: medium tertile of MET; high MET: highest tertile of MET. Low Townsend deprivation index:  
 197 lowest tertile of Townsend deprivation index; medium Townsend deprivation index: medium tertile of Townsend deprivation index; high Townsend deprivation index: highest tertile of Townsend  
 198 deprivation index.

199 Abbreviations: AHEI-2010, Alternate Healthy Eating Index-2010; AMED, Alternate Mediterranean Diet; BMI, body mass index; CI, confidence interval; DASH, Dietary Approaches to Stop  
 200 Hypertension; DII, dietary inflammatory index; GDQS, Global Diet Quality Score; GDQS-, negative submetric of Global Diet Quality Score; GDQS+, positive submetric of Global Diet Quality Score;  
 201 hPDI, healthful plant-based diet index; HR, hazard ratio; LCD, low carbohydrate diet; MET, metabolic equivalent; PDI, plant-based diet index; uPDI, unhealthy plant-based diet index.

### AHEI-2010

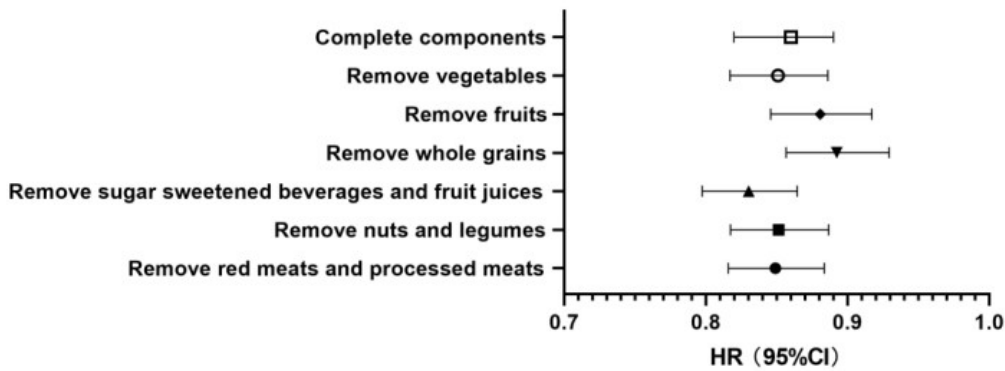

### AMED

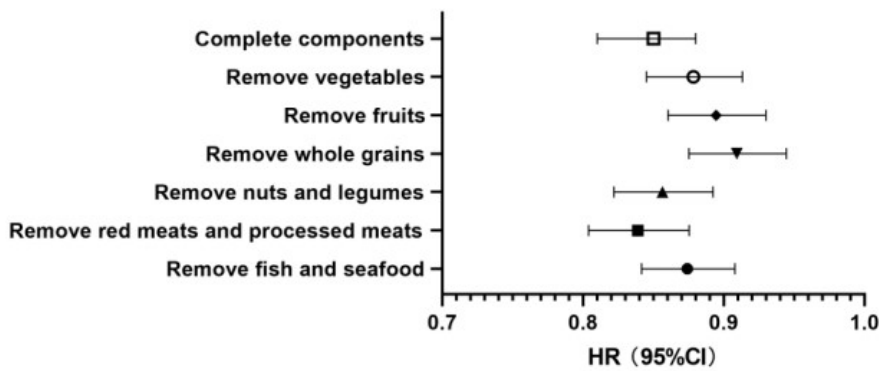

### DASH

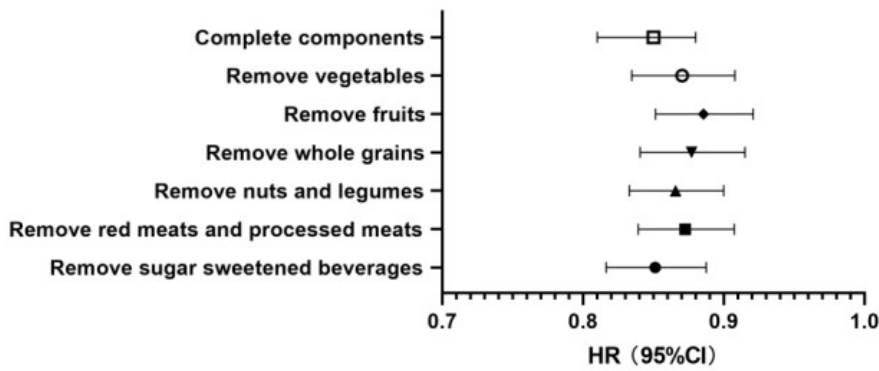

202  
 203 **Supplementary Figure 10. Associations of AHEI-2010, AMED and DASH with gastrointestinal disorders after removing food group**  
 204 **components.** The HRs (95% CIs) were calculated by comparing the highest quarter with the lowest quarter. The HRs are indicated by rectangles,  
 205 circles or triangles. The 95% CIs are reflected by the error bars. The model for AHEI-2010 and AMED of complete components was adjusted for age,  
 206 sex, BMI, race, cardiovascular disease, diabetes, smoking status, physical activity, multivitamin use, regular aspirin use, regular NSAID use and total  
 207 energy intake. The models for AHEI-2010 and AMED of removing components were further adjusted for the intake of the removing component. The  
 208 model for DASH of complete components was adjusted for age, sex, BMI, race, cardiovascular disease, diabetes, smoking status, physical activity,  
 209 multivitamin use, regular aspirin use, regular NSAID use, total energy intake and alcohol drinking status [none drinking, moderate drinking (<2  
 210 drinks/day for men, and <1 drink/day for women), or heavy drinking (≥2 drinks/day for men, and ≥1 drink/day for women)]. The models for DASH of  
 211 removing components were further adjusted for the intake of the removing component.

212 Abbreviations: AHEI-2010, Alternate Healthy Eating Index-2010; AMED, Alternate Mediterranean Diet; CI, confidence interval; HR, hazard ratio.

213 **Reference**

- 214 1 B. Liu, H. Young, F. L. Crowe, V. S. Benson, E. A. Spencer, T. J. Key, P. N. Appleby and V. Beral, Development and  
215 evaluation of the Oxford WebQ, a low-cost, web-based method for assessment of previous 24 h dietary intakes in large-scale  
216 prospective studies, *Public Health Nutr.*, 2011, **14**, 1998–2005.
- 217 2 C. L. Craig, A. L. Marshall, M. Sjöström, A. E. Bauman, M. L. Booth, B. E. Ainsworth, M. Pratt, U. Ekelund, A. Yngve, J. F.  
218 Sallis and P. Oja, International physical activity questionnaire: 12-country reliability and validity, *Med. Sci. Sports Exerc.*, 2003,  
219 **35**, 1381–1395.
- 220 3 M. Sjostrom, B. Ainsworth, A. Bauman, F. Bull, C. Hamilton-Craig and J. Sallis, Guidelines for data processing analysis of the  
221 International Physical Activity Questionnaire (IPAQ) - Short and long forms, 2005.
- 222 4 G. Zou, A modified poisson regression approach to prospective studies with binary data, *Am. J. Epidemiol.*, 2004, **159**, 702-706.
- 223 5 S. E. Chiuve, T. T. Fung, E. B. Rimm, F. B. Hu, M. L. McCullough, M. Wang, M. J. Stampfer and W. C. Willett, Alternative  
224 Dietary Indices Both Strongly Predict Risk of Chronic Disease, *J. Nutr.*, 2012, **142**, 1009–1018.
- 225 6 P. Wang, M. Song, A. H. Eliassen, M. Wang and E. L. Giovannucci, Dietary patterns and risk of colorectal cancer: a  
226 comparative analysis, *Int. J. Epidemiol.*, 2023, **52**, 96–106.
- 227 7 T. T. Fung, F. B. Hu, M. L. McCullough, P. K. Newby, W. C. Willett and M. D. Holmes, Diet quality is associated with the risk  
228 of estrogen receptor-negative breast cancer in postmenopausal women, *J. Nutr.*, 2006, **136**, 466–472.
- 229 8 T. T. Fung, S. E. Chiuve, M. L. McCullough, K. M. Rexrode, G. Logroscino and F. B. Hu, Adherence to a DASH-style diet and  
230 risk of coronary heart disease and stroke in women, *Arch. Intern. Med.*, 2008, **168**, 713–720.
- 231 9 A. Satija, S. N. Bhupathiraju, E. B. Rimm, D. Spiegelman, S. E. Chiuve, L. Borgi, W. C. Willett, J. E. Manson, Q. Sun and F. B.  
232 Hu, Plant-Based Dietary Patterns and Incidence of Type 2 Diabetes in US Men and Women: Results from Three Prospective  
233 Cohort Studies, *PLoS Med.*, 2016, **13**, e1002039.
- 234 10 T. L. Halton, W. C. Willett, S. Liu, J. E. Manson, C. M. Albert, K. Rexrode and F. B. Hu, Low-Carbohydrate-Diet Score and the  
235 Risk of Coronary Heart Disease in Women, *N. Engl. J. Med.*, 2006, **355**, 1991–2002.
- 236 11 S. Bromage, C. Batis, S. N. Bhupathiraju, W. W. Fawzi, T. T. Fung, Y. Li, M. Deitchler, E. Angulo, N. Birk, A. Castellanos-  
237 Gutiérrez, Y. He, Y. Fang, M. Matsuzaki, Y. Zhang, M. Moursi, S. Gicevic, M. D. Holmes, S. Isanaka, S. Kinra, S. E. Sachs, M.  
238 J. Stampfer, D. Stern and W. C. Willett, Development and Validation of a Novel Food-Based Global Diet Quality Score (GDQS),  
239 *J. Nutr.*, 2021, **151**, 75S-92S.
- 240 12 N. Shivappa, S. E. Steck, T. G. Hurley, J. R. Hussey and J. R. Hébert, Designing and developing a literature-derived, population-  
241 based dietary inflammatory index, *Public Health Nutr.*, 2014, **17**, 1689–1696.
- 242
